# Supplementary material for: A convenient method to estimate the glass transition temperature of small organic semiconductor materials
Source: Royal Society of Chemistry journal article supplement (doi:10.1039/d2cc01467j), 2022-01-01
Supplement: d2cc01467j1.pdf [file d2cc01467j1.pdf]

## ***SUPPLEMENTALLY INFORMATION***

### A convenient method to estimate glass transition temperature of small organic semiconductor materials

Youichi Tsuchiya,<sup>\*,a</sup> Nozomi Nakamura,<sup>a</sup> Shunta Kakumachi,<sup>a,b</sup> Keiko Kusuhara,<sup>a</sup> Chin-Yiu Chan<sup>a</sup> and Chihaya Adachi<sup>\*,a,b,c</sup>

<sup>a</sup> Center for Organic Photonics and Electronics Research (OPERA), Kyushu University, 744 Motooka, Nishi-ku, Fukuoka 819-0395, Japan.

<sup>b</sup> Department of Chemistry and Biochemistry, Kyushu University, Kyushu University, 744 Motooka, Nishi-ku, Fukuoka 819-0395, Japan.

<sup>c</sup> International Institute for Carbon Neutral Energy Research (WPI-I2CNER), Kyushu University, 744 Motooka, Nishi-ku, Fukuoka 819-0395, Japan.

E-mails:

tsuchiya@opera.kyushu-u.ac.jp,

adachi@cstf.kyushu-u.ac.jp

#### **Contents:**

- 1. Experimental details**
- 2. Structures of Materials**
- 3. Derivation of Fox equation**
- 4. Coefficient of determination,  $R^2$**
- 5. Note for plots of  $T_g$  versus fraction of blends**
- 6. Full scaled DSC thermal profile of CBP blends**
- 7. DSC thermal profile and  $T_g$  analysis of T2T blends**
- 8. Full scaled DSC thermal profile of T2T blends**
- 9. DSC analysis of T2T with quick cooling by liquid  $N_2$**
- 10. Results of  $T_g$  estimation using melt-blending methods for 4CzIPN and 5CzTRZ**
- 11. Summary of Thermal behavior of organic semiconductors**
- 12. DSC data for bulk organic semiconductors**
- 13. Appendix: Characterization of DSC curves**
- 14. Appendix: Purity of materials**

## 1. Experimental details

The organic semiconductors were purchased or synthesized by previously reported methods, and their purity was confirmed by the LC-ESI-MS analysis system consisting of HPLC, Waters Alliance 2695 with 3100 Mass Detector (Waters, USA) by using InertSustain C18 (GL Science, Japan) with a tetrahydrofuran-acetonitrile mixed system. **Cz-TRZ**,<sup>S1</sup> **PPT**,<sup>S2</sup> **DPEPO**,<sup>S3</sup> **5CzTRZ**,<sup>S4</sup> **HDT-1**,<sup>S5</sup> **TrisCz-TRZ**,<sup>S6</sup> and **PXZ-TRZ**<sup>S7</sup> were synthesized by ourselves with the reported methods. **CBP** (Angene International Limited), **TCTA** (TCI), **TPD** (TCI), **TPBi** (Suzhou Geao New Material Co., Ltd.), and **4CzIPN** (Chemicalsoft Co., Ltd.) were purchased and purified with sublimation in our laboratory. **mCP** (Changchun Tuo Cai Technology Co.,Ltd.), **mCBP** (NARD INSTITUTE, LTD.), **PyD2Cz** (Lumtec), **TAPC** (Lumtec), **Tris-PCz** (OODA KASEI CO., LTD.),  **$\alpha$ -NPD** (NIPPON STEEL Chemical & Material CO., LTD.), **m-MTDATA** (Lumtec), **T2T** (NARD INSTITUTE, LTD.), **DPPS** (Lumtec), **TmPyPB** (Lumtec), **SF3-TRZ** (NARD INSTITUTE, LTD.) were directly used as is with or without the purity check. The thermal analysis was performed with thermogravimetry-differential thermal analysis (TG-DTA 2400SA, BRUKER, Germany) and differential scanning calorimetry (DSC; DSC 204 F1, NETZCH, Germany). TG-DTA measurements were performed with the scan rate of 10 °C/min under N<sub>2</sub> atmosphere.

To measure  $T_g$  values by using DSC, it is necessary to melt the samples at the 1<sup>st</sup> heating process. Then, the sample is quickly cooled to around 0 °C (1<sup>st</sup> cooling), providing a glass state of samples. Next, we heat the sample again to find the  $T_g$  signal (2<sup>nd</sup> heating). In this time, we employ 10 and 20 °C/min as the heating and cooling rate, and 10 min as an interval time for the first heating and cooling. This long interval time is a waiting time for blending the two materials at the melting state; this is the origin of the name of the melt-blending method. It should be noted that the incubation temperature must be lower than  $T_{dec}$  of blend components. To obtain homogeneous blend glass, it is better to use the blend samples ground well by an agate mortar and the incubation time at a high temperature can be tuned. It is important to check the sample state after the measurement of 2<sup>nd</sup> cooling (same rate with 1<sup>st</sup> cooling); the sample formed clear glass without whitish-fog or not.

### References:

- S1) J. Xiao, X.-K. Liu, X.-X. Wang, C.-J. Zheng, and F. Li, *Org. Electron.* **2014**, 2763–2768.
- S2) C. Fan, C. Duan, Y. Wei, D. Ding, H. Xu, and W. Huang, *Chem. Mater.* 2015, **27**, 5131–5140.
- S3) J. Fawcett, A. W. G. Platt, S. Vickers, M. D. Ward, *Polyhedron* **2004**, 2561–2567.
- S4) L.-S. Cui, A. J. Gillett, S.-F. Zhang, H. Ye, Y. Liu, X.-K. Chen, Z.-S. Lin, E. W. Evans, W. K. Myers, T. K. Ronson, H. Nakanotani, S. Reineke, J.-L. Bredas, C. Adachi, and R. H. Friend, *Nat. Photon.* 2020, **14**, 636–642.
- S5) C.-Y. Chan, M. Tanaka, Y.-T. Lee, Y.-W. Wong, H. Nakanotani, T. Hatakeyama, and C. Adachi, *Nat. Photon.* 2021, **15**, 203–207.
- S6) S. Hirata, Y. Sakai, K. Masui, H. Tanaka, S.-Y. Lee, H. Nomura, N. Nakamura, M. Yasumatsu, H. Nakanotani, Q. Zhang, K. Shizu, H. Miyazaki, and C. Adachi, *Nat. Materials* 2015, **14**, 330–336.
- S7) H. Tanaka, K. Shizu, H. Miyazaki, C. Adachi, *Chem Commun.* 2012, **48**, 11392–11394.

## 2. Structures of Materials

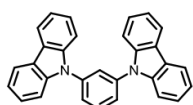

mCP

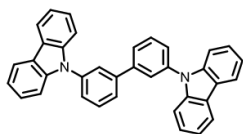

mCBP

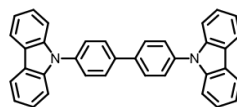

CBP

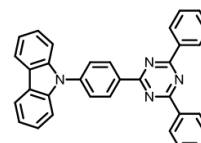

CzTRZ

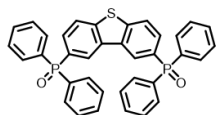

PPT

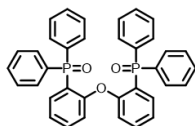

DPEPO

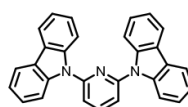

Py2DCz

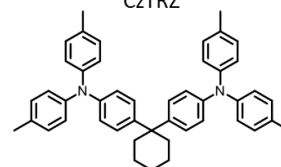

TAPC

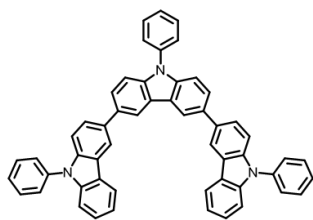

Tris-PCz

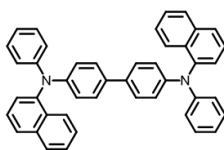

$\alpha$ -NPD

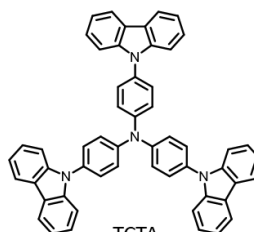

TCTA

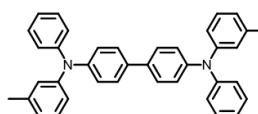

TPD

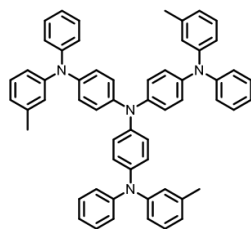

*m*-MTDATA

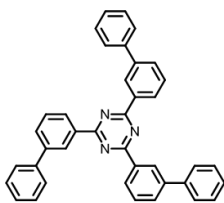

T2T

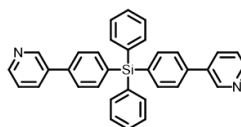

DPPS

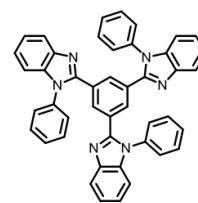

TPBi

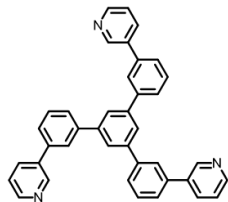

TmPyPB

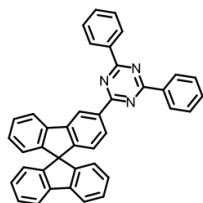

SF3-TRZ

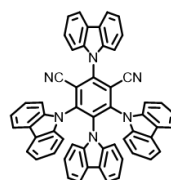

4CzIPN

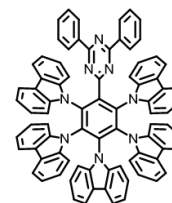

5CzTRZ

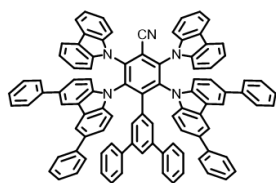

HDT-1

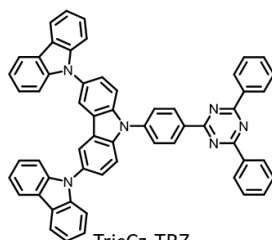

TrisCz-TRZ

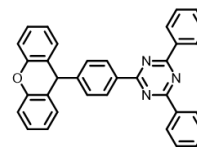

PXZ-TRZ

### 3. Derivation of Fox equation

In general,  $T_g$  (in Kelvin) of amorphous polymer blends between two components, A and B, follows the relationship of the Gordon-Taylor equation with  $T_g$  of each component ( $T_{g,A}^0$  and  $T_{g,B}^0$ ).<sup>8</sup>

$$T_g = \frac{w_A T_{g,A}^0 + k w_B T_{g,B}^0}{w_A + k w_B} = \frac{(1 - w_B) T_{g,A}^0 + k w_B T_{g,B}^0}{(1 - w_B) + k w_B}, \quad (S3.1)$$

where  $w_A$  and  $w_B$  are the weight fraction of each component A and B.  $k$  is the ratio related to the  $T_g$  values and densities of the glass states ( $\rho_A^0$  and  $\rho_B^0$ ) for each component as follows,<sup>9</sup>

$$k = \frac{T_{g,A}^0}{T_{g,B}^0} \cdot \frac{\rho_A^0}{\rho_B^0}. \quad (S3.2)$$

When  $\rho_A^0 = \rho_B^0$  is employed as the assumption, the equation can be rewritten as the simple form called Fox equation as follows,<sup>7</sup>

$$\frac{1}{T_g} = \frac{w_A}{T_{g,A}^0} + \frac{w_B}{T_{g,B}^0} = \frac{1 - w_B}{T_{g,A}^0} + \frac{w_B}{T_{g,B}^0}. \quad (S3.3)$$

### 4. Coefficient of determination, $R^2$

Eqn (4) derived from the Fox equation does not give an exact liner relationship between the theoretical  $T_g$  and the fraction of the target compound but it gives an approximately linear relationship. In this report, therefore, the most general  $R^2$  which is defined by the residual sum of squares (RSS) and a total sum of squares (TSS) was employed as an accuracy value for theoretically estimated  $T_g$ .

$$R^2 = 1 - \frac{RSS}{TSS} = 1 - \frac{\sum_{i=1}^n (y_i - \hat{y}_i)^2}{\sum_{i=1}^n (y_i - \bar{y}_i)^2}, \quad (S4.1)$$

where  $y_i$  are the set of observations,  $\hat{y}_i$  is the set of theoreticals, and  $\bar{y}_i$  is the average of  $y_i$ . The  $R^2$  value is sometimes provided as a negative value, which means the theoretical model cannot explain the observed values.

### 5. Note for plots of $T_g$ versus fraction of blends

The Fox equation does not provide the liner plot for  $T_g$  of blends. When it is required the pictures in the exact liner relationship, the deformed eqns (S5.2) and (S5.3) can be employed to draw the theoretical line and plot the observed  $T_g$  instead of eqn (4).

$$T_g = T_{g,matrix}^0 T_{g,target}^0 W \quad (S5.2)$$

$$W = \frac{1}{T_{g,target}^0 + (T_{g,matrix}^0 - T_{g,target}^0) w_{target}} \quad (S5.3)$$

where  $T_{g,target}^0$  is the average estimated  $T_g$  value for the target material from each observed  $T_g$  value. It should note that Kelvin was used as the temperature to apply each equation while those values were written in the Celsius degree in the main text, Figures, and Tables.

## 6. Full scaled DSC thermal profile of organic semiconductor blends

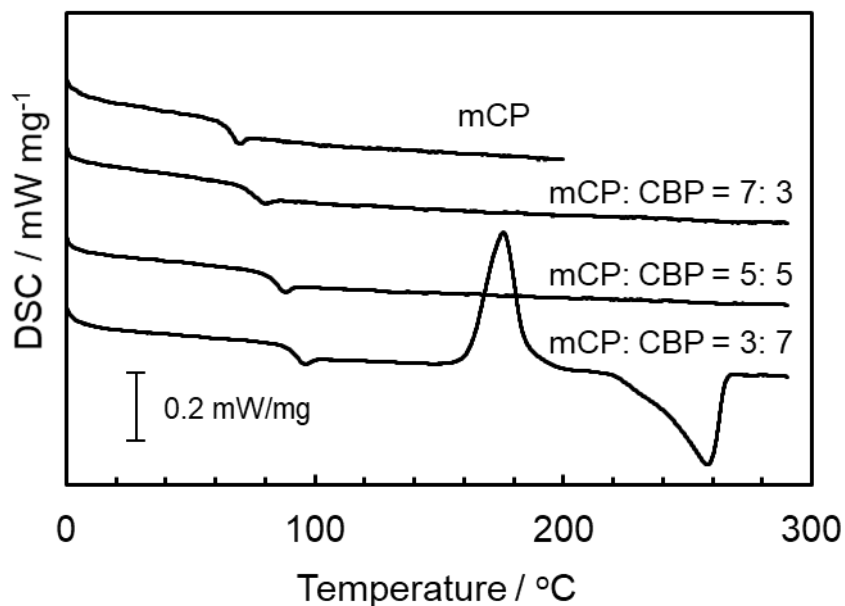

Fig. S1 DSC curves of **mCP/CBP** blends with the various blend ratio at 2<sup>nd</sup> heating.

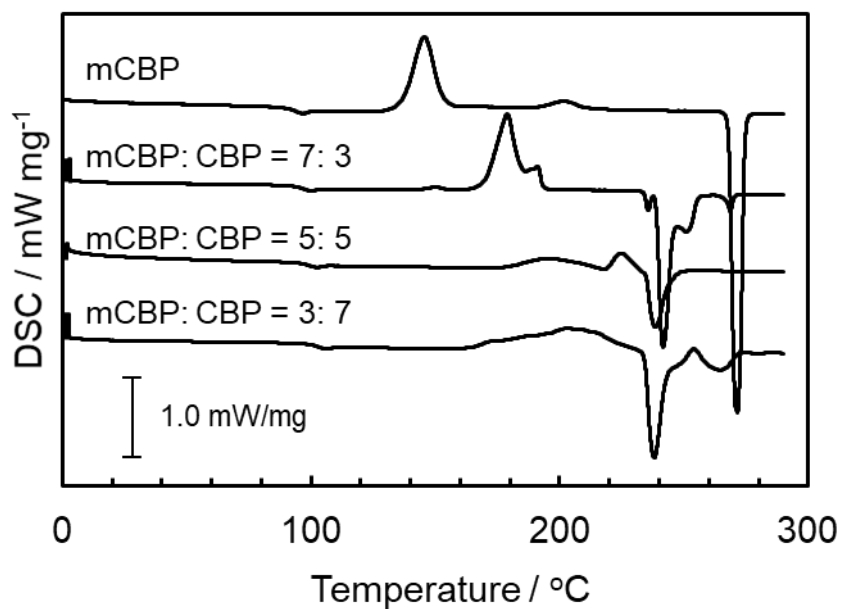

Fig. S2 DSC curves of **mCBP/CBP** blends with the various blend ratio at 2<sup>nd</sup> heating.

## 7. DSC thermal profile and $T_g$ analysis of T2T blends

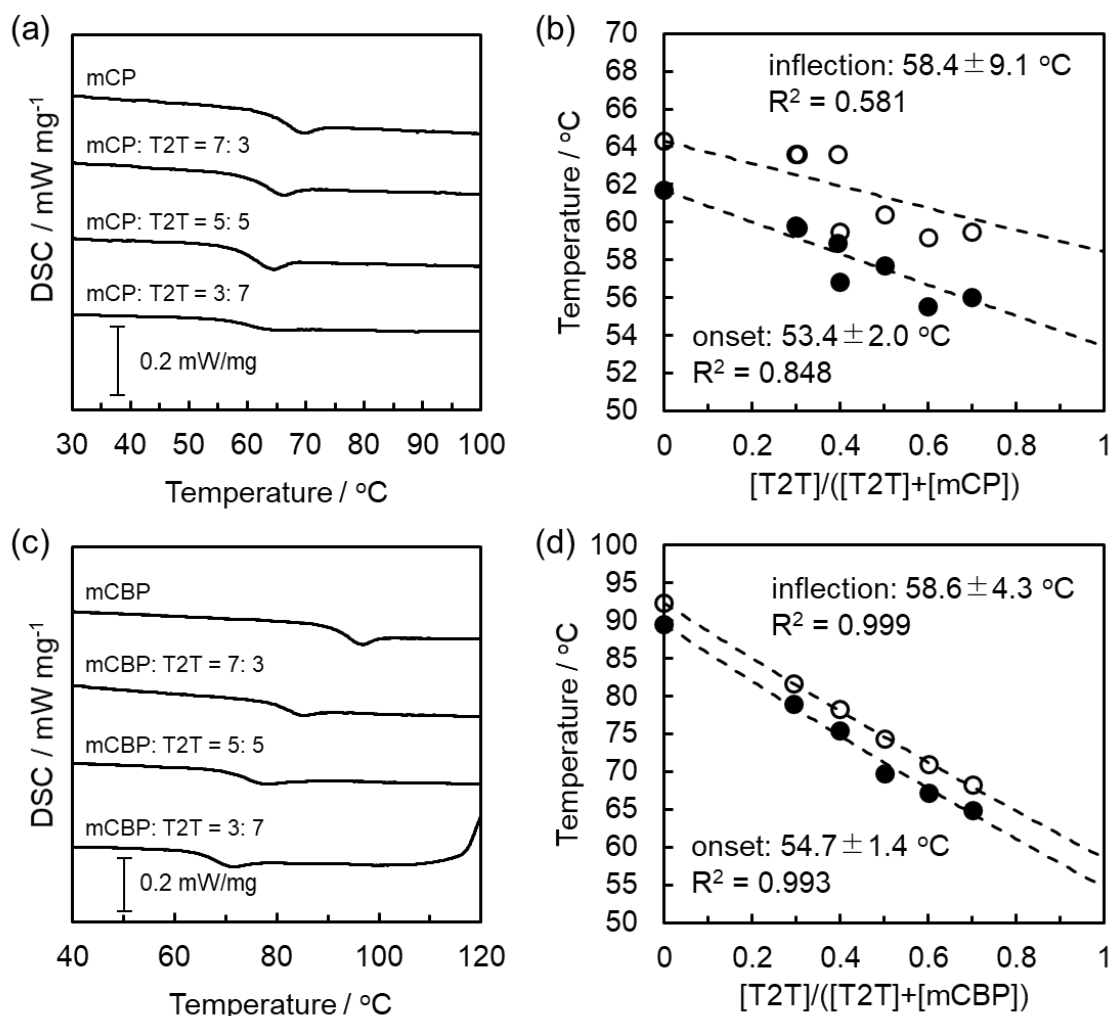

Fig. S3 (a and c)  $T_g$  signals of **T2T** blends at second heating of DSC measurement with **mCP** (a) or **mCBP** (c) as a matrix. (b and d) Plots of inflection (open circle) and onset  $T_g$  values (closed circle) versus CBP fraction of each blend; (b) **mCP** and (d) **mCBP**. Broken lines were obtained with eqn (4) as theoretical curve of the Fox equation.

## 8. Full scaled DSC thermal profile of T2T blends

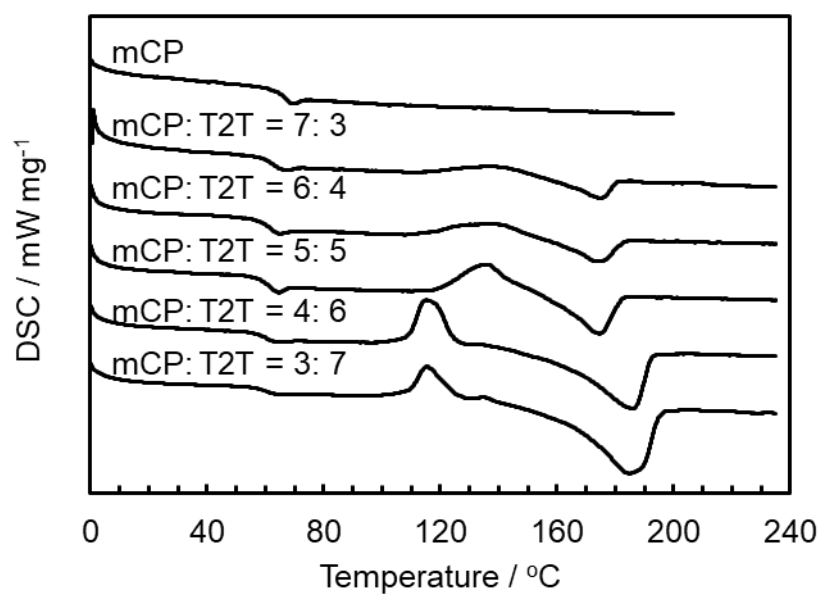

Fig. S4 DSC curves of **mCP/T2T** blends with the various blend ratio at 2<sup>nd</sup> heating.

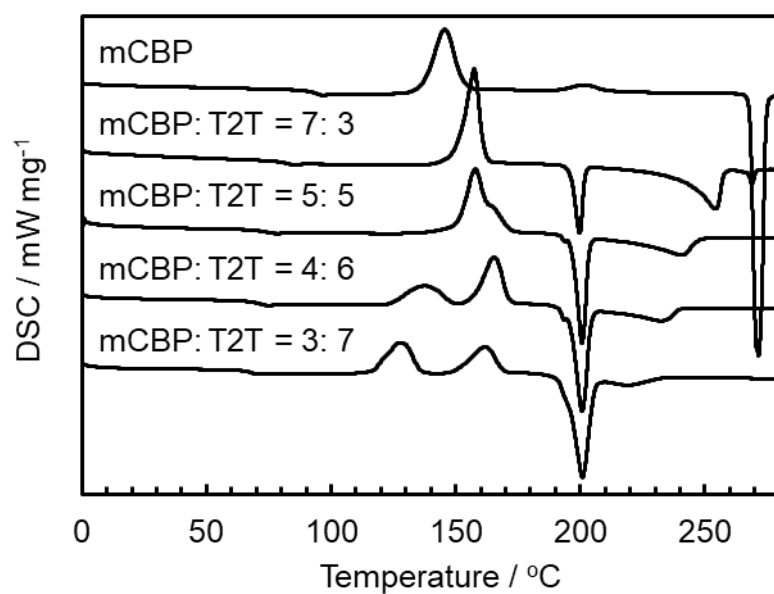

Fig. S5 DSC curves of **mCBP/T2T** blends with the various blend ratio at 2<sup>nd</sup> heating.

## 9. DSC analysis of T2T with quick cooling by liquid N<sub>2</sub>

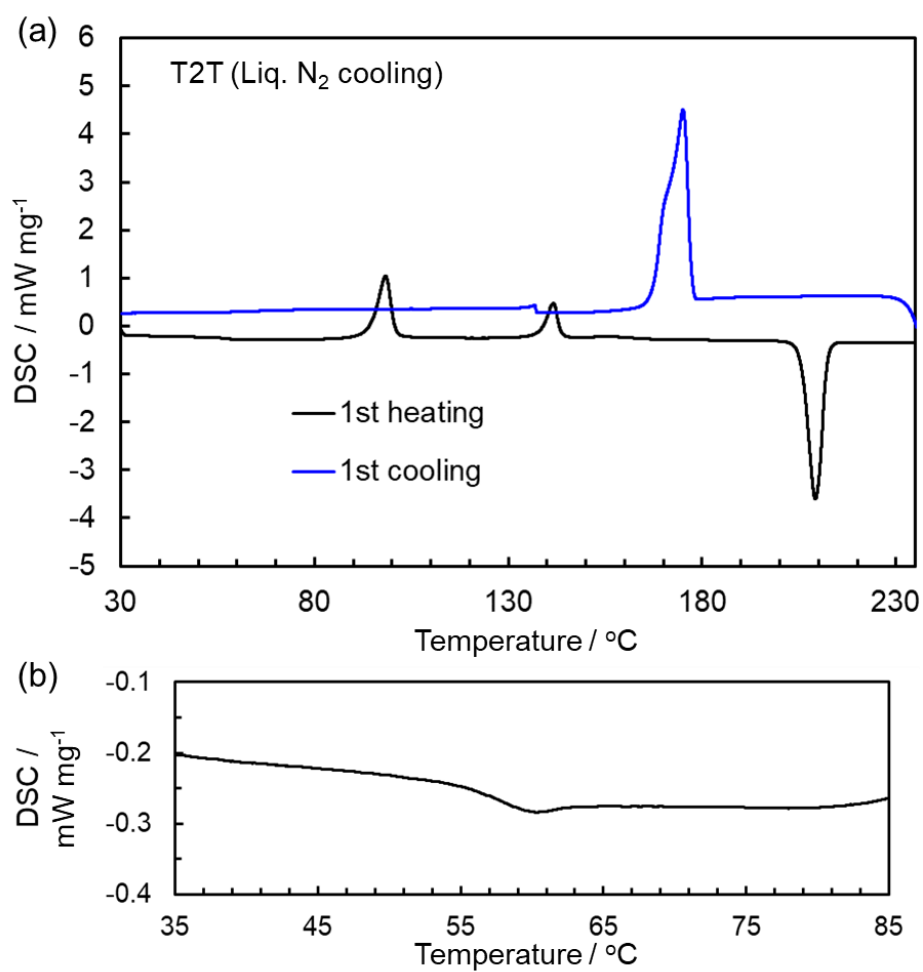

Fig. S6 (a) DSC curves of **T2T** by heating and cooling processes. (b) Focusing  $T_g$  signal at 1<sup>st</sup> heating. The sample **T2T** in an aluminum pan was cooled into liquid N<sub>2</sub> after heating to 230 °C on hot plate.



## 10. Results of $T_g$ estimation using melt-blending methods for 4CzIPN and 5CzTRZ

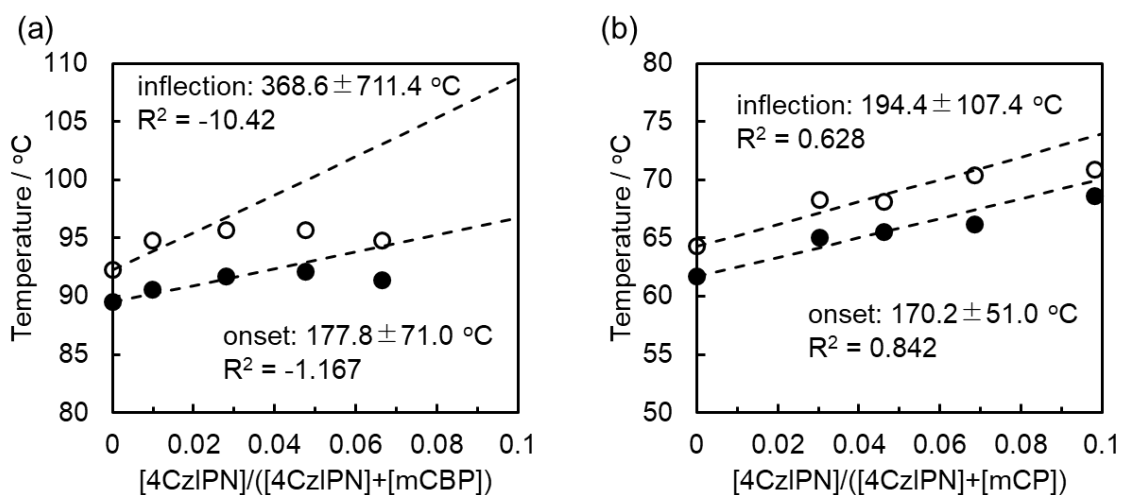

Fig. S7 Plots of inflection (open circle) and onset  $T_g$  values (closed circle) versus **4CzIPN** fraction of **4CzIPN-mCBP** (a) or **4CzIPN-mCP** (b) blends; the horizontal scale was emphasized from 0 to 0.1. Broken lines were obtained with eqn (4) as theoretical curve of Fox equation.

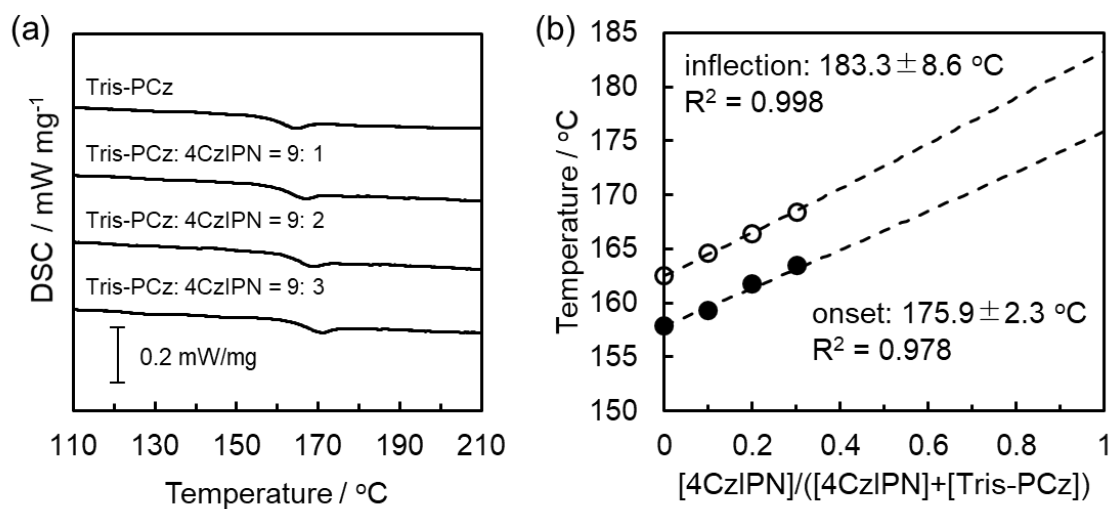

Fig. S8 (a)  $T_g$  signals of **4CzIPN** blends at second heating of DSC measurement with **Tris-PCz** as a matrix. (b) Plots of inflection (open circle) and onset  $T_g$  values (closed circle) versus **4CzIPN** fraction of each blend. Broken lines were obtained with eqn (4) as theoretical curve of Fox equation.

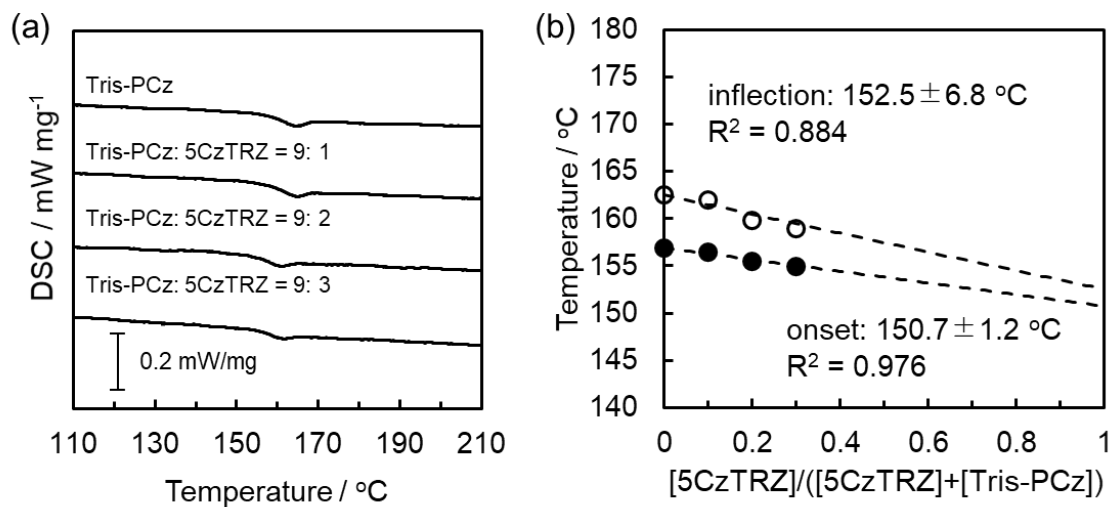

Fig. S9 (a)  $T_g$  signals of **5CzTRZ** blends at second heating of DSC measurement with **Tris-PCz** as a matrix. (b) Plots of inflection (open circle) and onset  $T_g$  values (closed circle) versus **5CzTRZ** fraction of each blend. Broken lines were obtained with eqn (4) as theoretical curve of Fox equation.

## 11. Summary of Thermal behavior of organic semiconductors

Table S1. Thermo-physical parameters for interest OLED materials (cooling rate, 20 °C min<sup>-1</sup>; heating rate, 10 °C/ min)

|                                 | Purity               | $T_g^i$ /°C            | $T_g^o$ /°C            | $T_c$ /°C                             | $T_m^f$ /°C | $T_{dec}^g$ /°C | $T_g^{Lit}$ /°C                                                                                                                                                                                 |
|---------------------------------|----------------------|------------------------|------------------------|---------------------------------------|-------------|-----------------|-------------------------------------------------------------------------------------------------------------------------------------------------------------------------------------------------|
| Host materials                  |                      |                        |                        |                                       |             |                 |                                                                                                                                                                                                 |
| mCP                             | 1.000                | 64                     | 62                     | N.D.                                  | 177         | -               | 55 (-/-/-) <sup>S8</sup> , 60 (-/-/-) <sup>S9</sup> , 65 (100/10/i) <sup>S10</sup> , 66 (-/-/-) <sup>S11</sup>                                                                                  |
| mCBP                            | 0.999                | 92                     | 90                     | 137                                   | 271         | 349             | 92 (100/10/i) <sup>S10</sup> , (-/-/-) <sup>S11</sup>                                                                                                                                           |
| CBP                             | 0.996                | 109                    | 103                    | 162 <sup>b)</sup>                     | 282         | -               | 62 (-/-/-) <sup>S9</sup> , 112(Liq.N <sub>2</sub> /50/i) <sup>S12</sup>                                                                                                                         |
| Cz-TRZ                          | 0.999                | 92                     | 90                     | 149                                   | 276         | 345             | N/A                                                                                                                                                                                             |
| PPT                             | 0.999                | 109                    | 105                    | N.D.                                  | 252         | 406             | 107 (-/-/-) <sup>S11</sup>                                                                                                                                                                      |
| DPEPO                           | 0.994                | 95                     | 90                     | 160                                   | 282         | 316             | 93 (100/10/i) <sup>S10</sup> , 94 (-/-/-) <sup>S11</sup>                                                                                                                                        |
| PyD2Cz                          | > 0.99 <sup>a)</sup> | 74                     | 70                     | N.D.                                  | 308         | 319             | N/A                                                                                                                                                                                             |
| Hole transporting materials     |                      |                        |                        |                                       |             |                 |                                                                                                                                                                                                 |
| TAPC                            | 0.996                | 86                     | 82                     | N.D.                                  | 187         | 357             | 78 (10/10/-) <sup>S13</sup> , 79 (-/-/-) <sup>S14</sup> , 89 (-/-/-) <sup>S15</sup>                                                                                                             |
| Tris-PCz                        | 0.999                | 163                    | 157                    | N.D.                                  | N.D.        | 481             | 154 (100/10/i) <sup>S10</sup>                                                                                                                                                                   |
| $\alpha$ -NPD                   | 0.998                | 101                    | 95                     | 211                                   | 282         | 375             | 75 (-/-/-) <sup>S16</sup> , 95 (-/-/-) <sup>S17</sup> , 96 (-/-/-) <sup>S14</sup> , 99 (-/-/-) <sup>S11</sup> 100 (-/-/-) <sup>S15</sup>                                                        |
| TCTA                            | 0.997                | 155                    | 152                    | N.D.                                  | 300         | 471             | 151 (-/5/o) <sup>S18</sup> , (-/-/-) <sup>S19</sup>                                                                                                                                             |
| TPD                             | 0.997                | 65                     | 63                     | N.D.                                  | 171         | 329             | 58 (-/-/-) <sup>S14</sup> , 60 (10/10/-) <sup>S20</sup> , (-/5/-) <sup>S11</sup> , (-/-/-) <sup>S18</sup> , 61 (-/-/-) <sup>S16</sup> , 63 (-/-/-) <sup>S21</sup> , 65 (10/10/-) <sup>S22</sup> |
| <i>m</i> -MTDATA                | > 0.99 <sup>a)</sup> | 82                     | 76                     | N.D.                                  | 206         | 399             | 75 (-/-/-) <sup>S14</sup> , (-/-/0) <sup>S23</sup>                                                                                                                                              |
| Electron transporting materials |                      |                        |                        |                                       |             |                 |                                                                                                                                                                                                 |
| T2T                             | 1.000                | 59<br>56 <sup>c)</sup> | 55<br>55 <sup>c)</sup> | 109 <sup>b)</sup><br>94 <sup>c)</sup> | 214         | 366             | 55 (-/-/-) <sup>S24</sup> , 95 (-/-/-) <sup>S25</sup>                                                                                                                                           |
| DPPS                            | > 0.99 <sup>a)</sup> | 53                     | 50                     | N.D.                                  | 154         | 312             | N/A                                                                                                                                                                                             |
| TPBi                            | 0.999                | 123                    | 120                    | N.D.                                  | 277         | 381             | 122 (-/-/-) <sup>S26</sup> , 124 (-/-/i) <sup>S27</sup> , 127 (-/10/-) <sup>S28</sup>                                                                                                           |
| TmPyPB                          | 0.993                | 79                     | 76                     | 121 <sup>d)</sup>                     | 198         | 395             | 79 (-/10/-) <sup>S29</sup>                                                                                                                                                                      |
| SF3-TRZ                         | 1.000                | 134                    | 130                    | 207                                   | 278         | 348             | 135 (-/-/i) <sup>S30</sup>                                                                                                                                                                      |
| TADF materials                  |                      |                        |                        |                                       |             |                 |                                                                                                                                                                                                 |
| 4CzIPN                          | 0.993                | 183                    | 176                    | 265 <sup>e)</sup>                     | 381         | 389             | N/A                                                                                                                                                                                             |
| 5CzTRZ                          | 0.994                | 153                    | 151                    | N.D.                                  | 471         | 486             | N/A                                                                                                                                                                                             |
| HDT-1                           | 0.999                | 205                    | 197                    | N.D.                                  | 414         | 491             | N/A                                                                                                                                                                                             |
| TrisCz-TRZ                      | 0.998                | 198                    | 195                    | N.D.                                  | 354         | 491             | 197 (-/10/-) <sup>S31</sup>                                                                                                                                                                     |
| PXZ-TRZ                         | 0.995                | 89                     | 87                     | 138                                   | 308         | 351             | N/A                                                                                                                                                                                             |

All values were written by considering the number of significant figures. a) Information from vendor company. b) Estimated from **mCP** blend with the fraction of 0.7. c) Using sample cooled with liquid N<sub>2</sub> after heating  $T_m+20$  °C on heater at air atmosphere condition. d) Estimated from first heating of DSC. e) Estimated from **Tris-PCz** blend with the fraction of 0.3. f) peak value in DTA measurement. g) 0.5% weight loss in TG measurement. h) indicating in parentheses as cooling rate (°C/min)/ heating rate (°C/min)/ inflection (i) or onset (o); “-” means not provided.

### References for Table S1:

- S8) S.-J. Yeh, M.-F. Wu, C.-T. Chen, Y.-H. Song, Y. Chi, M.-H. Ho, S.-F. Hsu and C.-H. Chen, *Adv. Mater.* 2005, **17**, 285-289.
- S9) M.-H. Tsai, Y.-H. Hong, C.-H. Chang, H.-C. Su, C.-C. Wu, A. Matoliukstyte, J. Simokaitiene, S. Grigalevicius, J. V. Grazulevicius and C.-P. Hsu, *Adv. Mater.* 2007, **19**, 862. (= Ref. 11)
- S10) B. A. Naqvi, M. Schmid, E. Crovini, P. Sahay, T. Naujoks, F. Rodella, Z. Zhang, P. Strohrig, S. Bräse, E. Zysman-Colman and W. Brütting, *Front. Chem.* 2020, **8**, 750.
- S11) N. Notsuka, R. Kabe, K. Goushi and C. Adachi, *Adv. Funct. Mater.* 2017, **27**, 1703902.
- S12) N. Van den Brande, A. Gujral, C. Huang, K. Bagchi, H. Hofstetter, L. Yu, and M. D. Ediger, *Cryst. Growth Des.* 2018, **18**, 5800-5807. (= Ref. 12)
- S13) P. Strohrig and J. V. Grazulevicius, *Adv. Mater.* 2002, **14**, 1439-1452.
- S14) M. Aonuma, T. Oyamada, H. Sasabe, T. Miki, C. Adachi, *Appl. Phys. Lett.* 2007, **90**, 183503.
- S15) Shah Nawaz, S. S. Swayamprabha, M. R. Nagar, R. A. K. Yadav, S. Gull, D. K. Dubey and J.-H. Jou, *J. Mater. Chem. C* 2019, **7**, 7144-7158.
- S16) Y. Shirota, K. Okumoto and H. Inada, *Synth. Metals* 2000, **111-112**, 387-391.
- S17) S. A. Van Slyke, C. H. Chen, and C. W. Tang, *Appl. Phys. Lett.* 1996, **69**, 2160-2162.
- S18) K. Naito and A. Miura, *J. Phys. Chem.* 1993, **97**, 6240-6248.
- S19) Y. Kuwabara, H. Ogawa, H. Inada, N. Noma and Y. Shirota, *Adv. Mater.* 1994, **6**, 677-679.
- S20) H. Tanaka, S. Tokito, Y. Taga and A. Okada, *J. Chem. Soc., Chem. Commun.* 1996, 2175-2176.
- S21) D. M. Pai, J. F. Yanus and M. Stolka, *J. Phys. Chem.* 1984, **88**, 4714-4717.
- S22) P. Strohrig and J. V. Grazulevicius, *Adv. Mater.* 2002, **14**, 1439-1452.
- S23) Y. Shirota, T. Kobata and N. Noma, *Chem. Lett.* 1989, **18**, 1145-1148.
- S24) D. P. K. Tsang and C. Adachi, *Sci. Rep.* 2016, **6**, 22463. (= Ref. 18)
- S25) H.-F. Chen, S.-J. Yang, Z.-H. Tsai, W.-Y. Hung, T.-C. Wang and K.-T. Wong, *J. Mater. Chem.* 2009, **19**, 8112. (= Ref 17)
- S26) C. Mayr and W. Brütting, *Chem. Mater.* 2015, **27**, 2759-2762.
- S27) H. K. Kim, Y. H. Byun, R. R. Das, B. K. Choi and P. S. Ahn, *Appl. Phys. Lett.* 2007, **91**, 093512.
- S28) Z. Wang, P. Lu, S. Chen, Z. Gao, F. Shen, W. Zhang, Y. Xu, H. S. Kwok and Y. Ma, *J. Mater. Chem.* 2011, **21**, 5451-5456.
- S29) S.-J. Su, Y. Takahashi, T. Chiba, T. Takeda and J. Kido, *Adv. Funct. Mater.* 2009, **19**, 1260.
- S30) L.-S. Cui, S.-B. Ruan, F. Bencheikh, R. Nagata, L. Zhang, K. Inada, H. Nakanotani, L.-S. Liao and C. Adachi, *Nat. Commun.* 2017, **8**, 2250.
- S31) Y. Li, J.-J. Liang, H.-C. Li, L.-S. Cui, M.-K. Fung, S. Barlow, S. R. Marder, C. Adachi, Z.-Q. Jiang and L.-S. Liao, *J. Mater. Chem. C* 2018, **6**, 5536-5541.

## 12. DSC data for bulk organic semiconductors

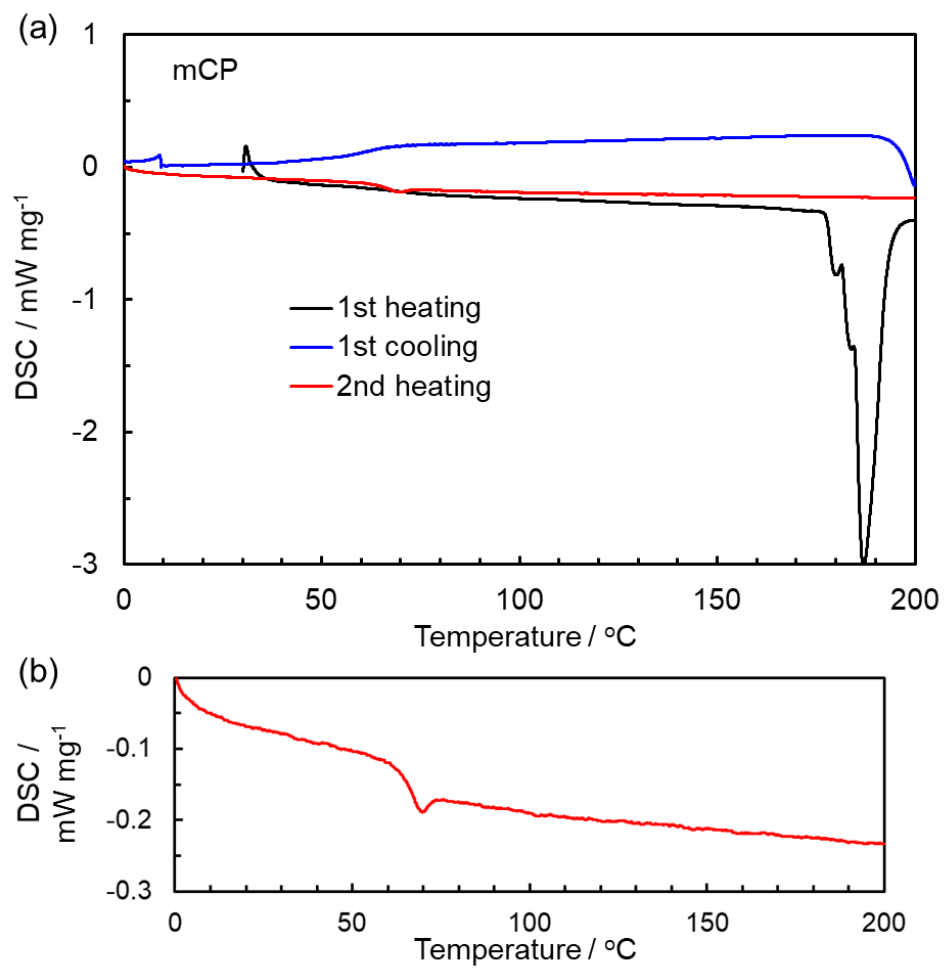

Fig. S10 (a) DSC curves of **mCP** by heating and cooling processes. (b) Focusing  $T_g$  signal at 2<sup>nd</sup> heating.

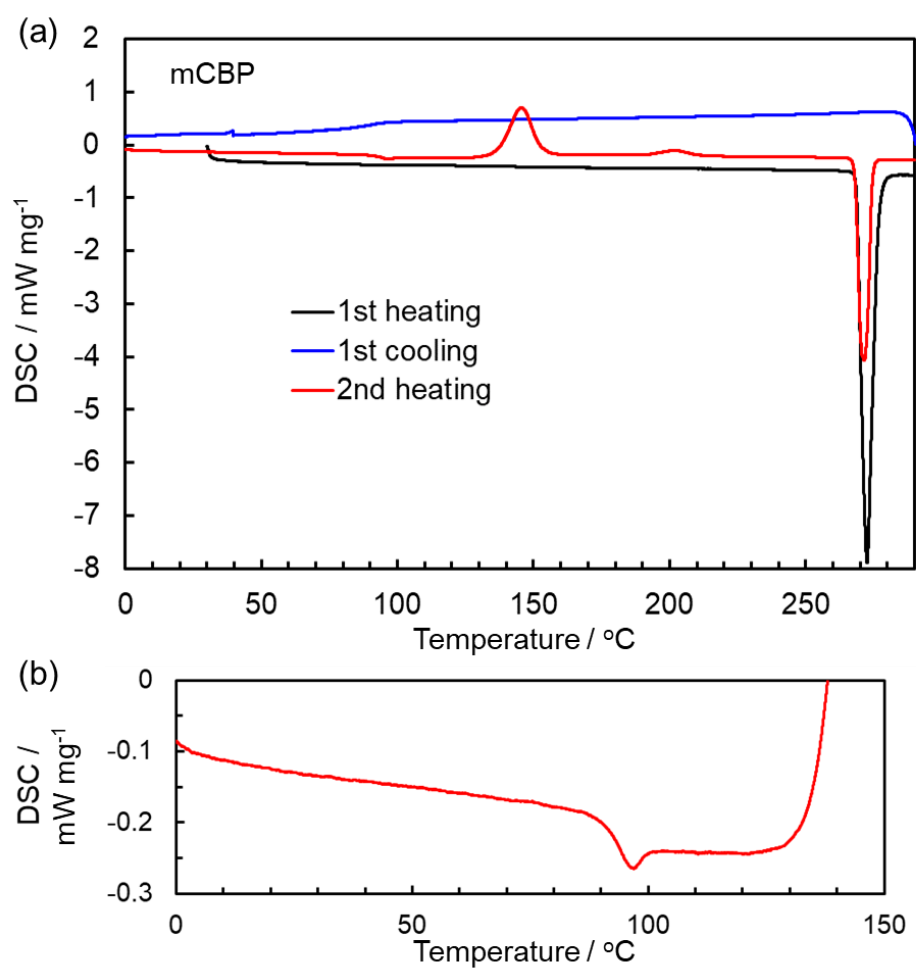

Fig. S11 (a) DSC curves of **mCBP** by heating and cooling processes. (b) Focusing  $T_g$  signal at 2<sup>nd</sup> heating.

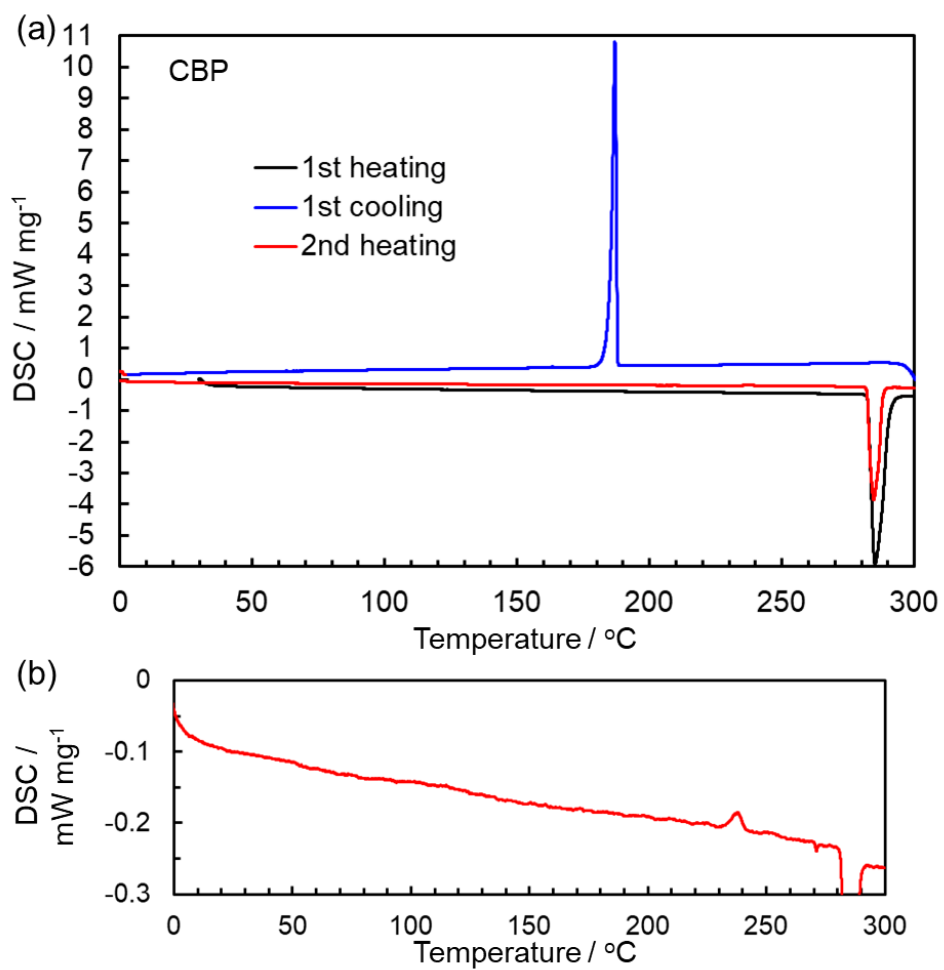

Fig. S12 (a) DSC curves of **CBP** by heating and cooling processes. (b) Focusing  $T_g$  signal at 2<sup>nd</sup> heating.

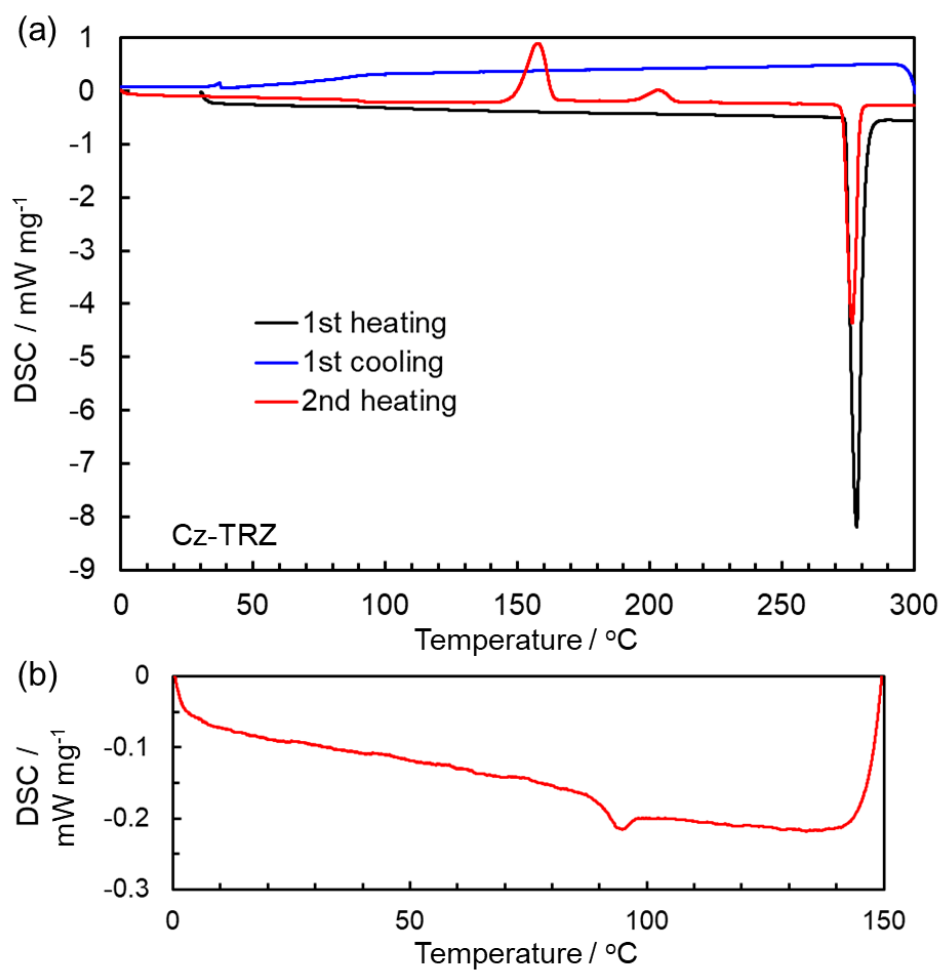

Fig. S13 (a) DSC curves of **Cz-TRZ** by heating and cooling processes. (b) Focusing  $T_g$  signal at 2<sup>nd</sup> heating.



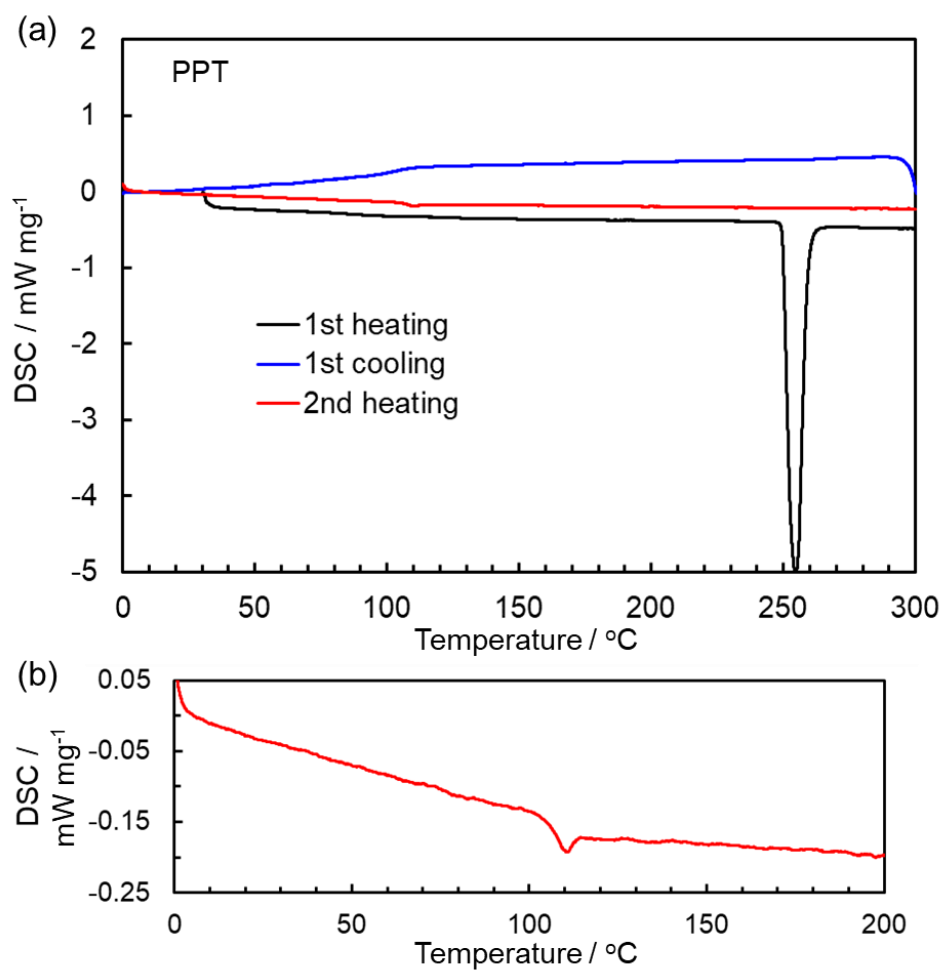

Fig. S14 (a) DSC curves of **PPT** by heating and cooling processes. (b) Focusing  $T_g$  signal at 2<sup>nd</sup> heating.

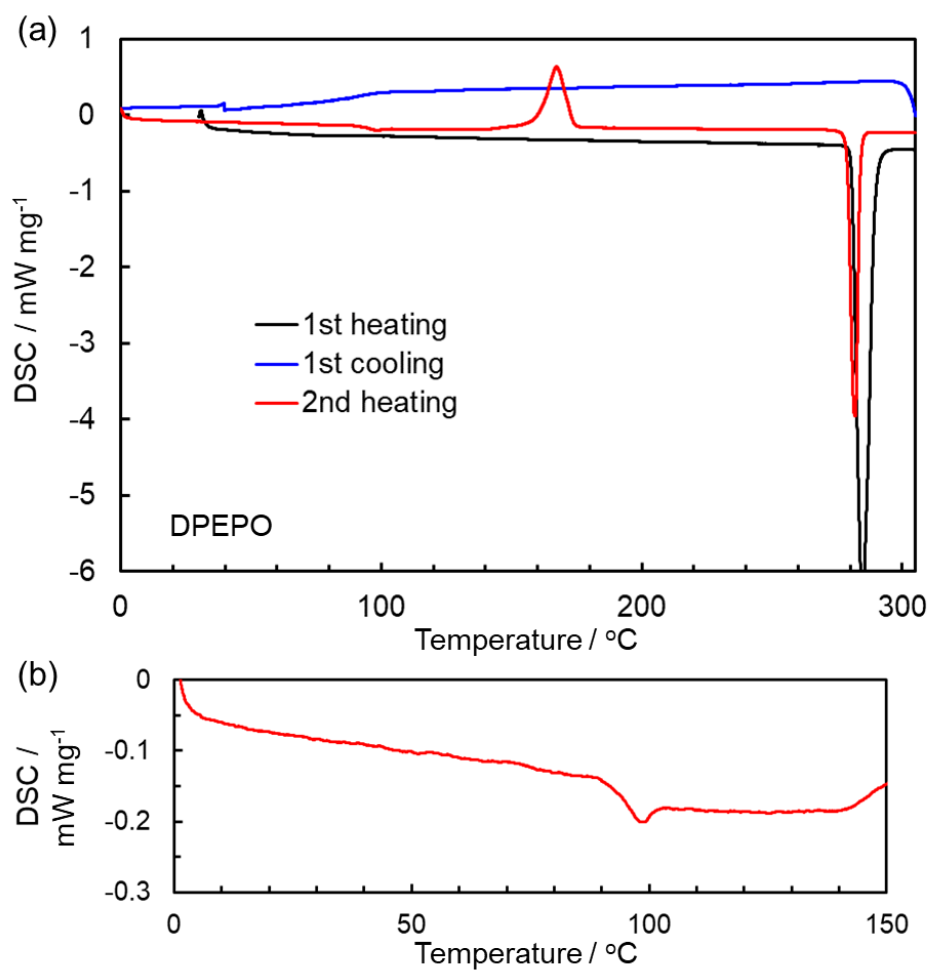

Fig. S15 (a) DSC curves of **DPEPO** by heating and cooling processes. (b) Focusing  $T_g$  signal at 2<sup>nd</sup> heating.

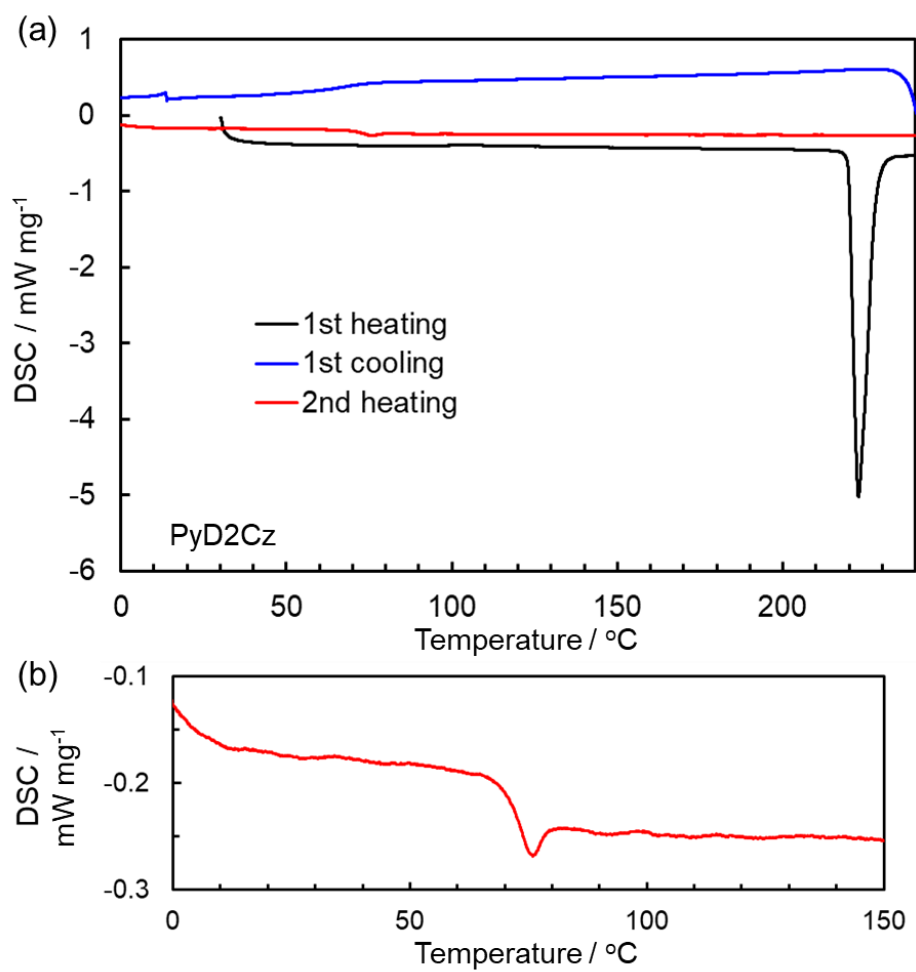

Fig. S16 (a) DSC curves of **PyD2Cz** by heating and cooling processes. (b) Focusing  $T_g$  signal at 2<sup>nd</sup> heating.

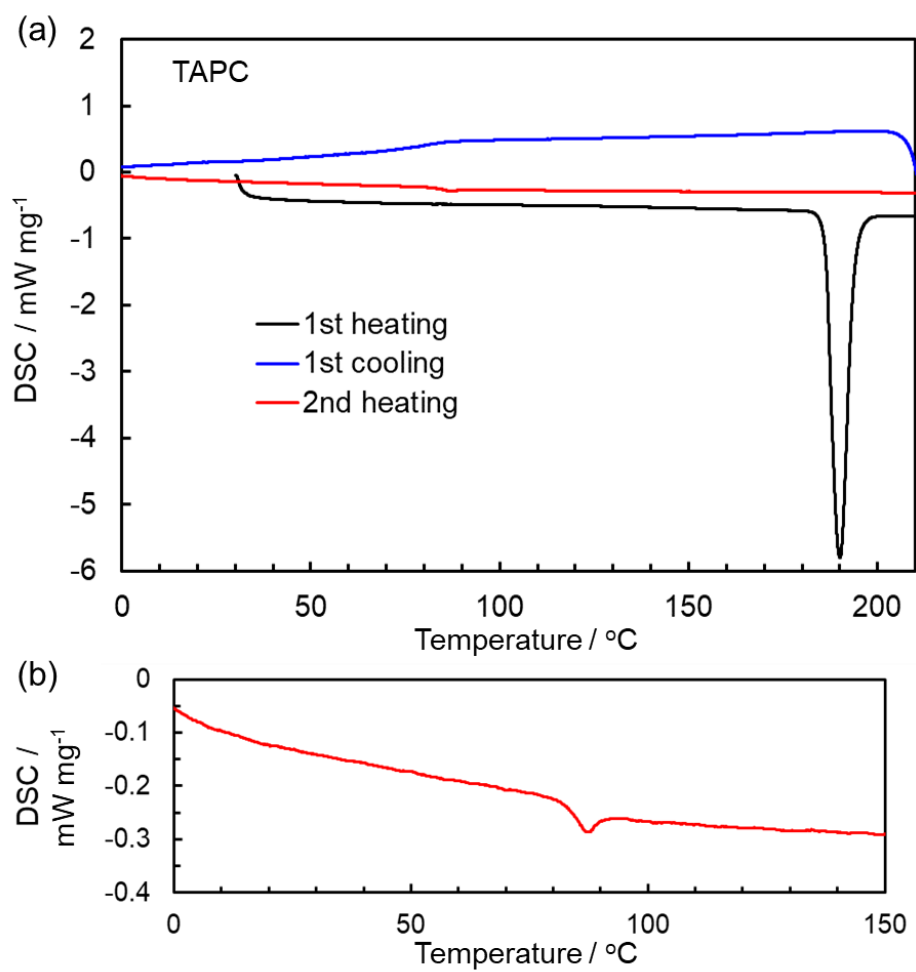

Fig. S17 (a) DSC curves of **TAPC** by heating and cooling processes. (b) Focusing  $T_g$  signal at 2<sup>nd</sup> heating.

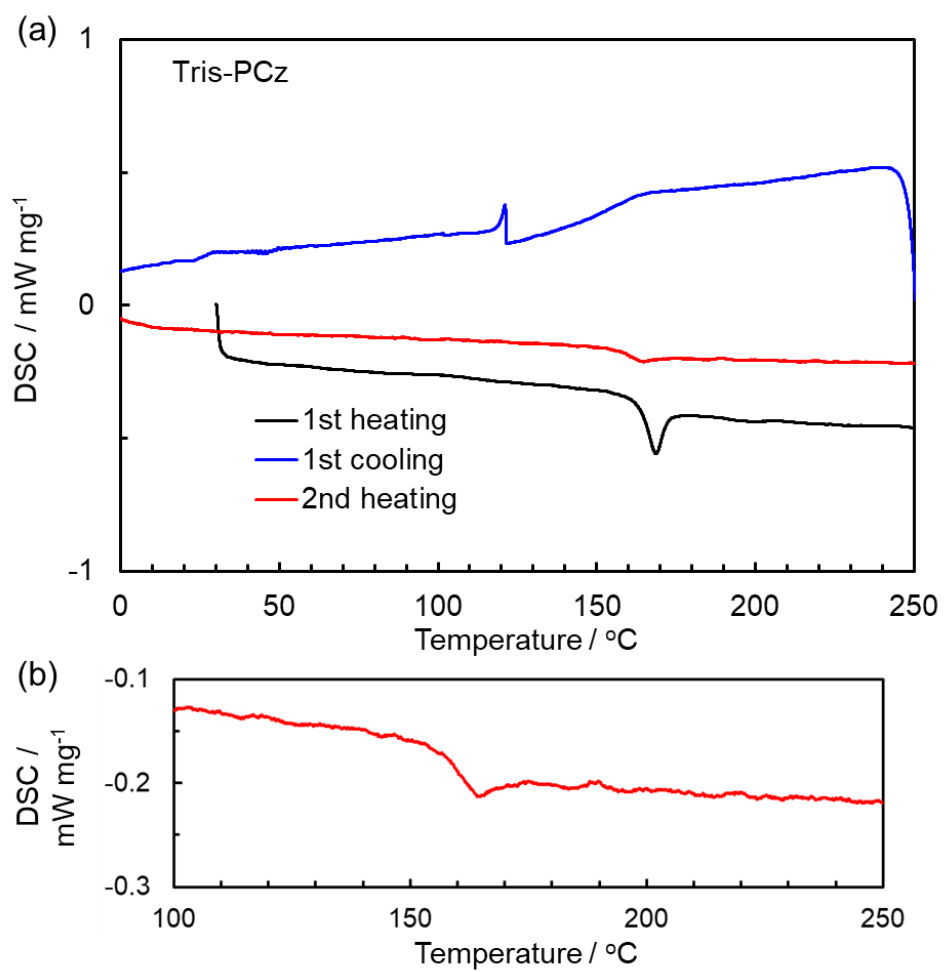

Fig. S18 (a) DSC curves of **Tris-PCz** by heating and cooling processes. (b) Focusing  $T_g$  signal at 2<sup>nd</sup> heating.

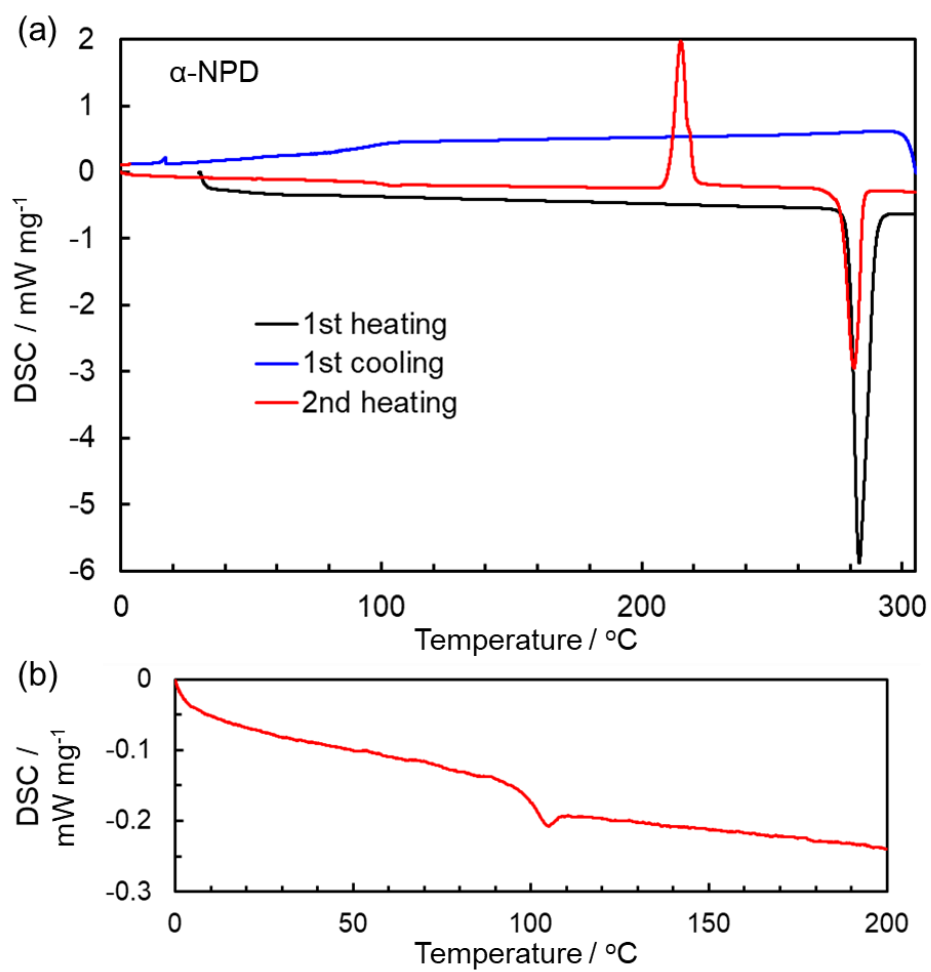

Fig. S19 (a) DSC curves of  $\alpha$ -NPD by heating and cooling processes. (b) Focusing  $T_g$  signal at 2<sup>nd</sup> heating.

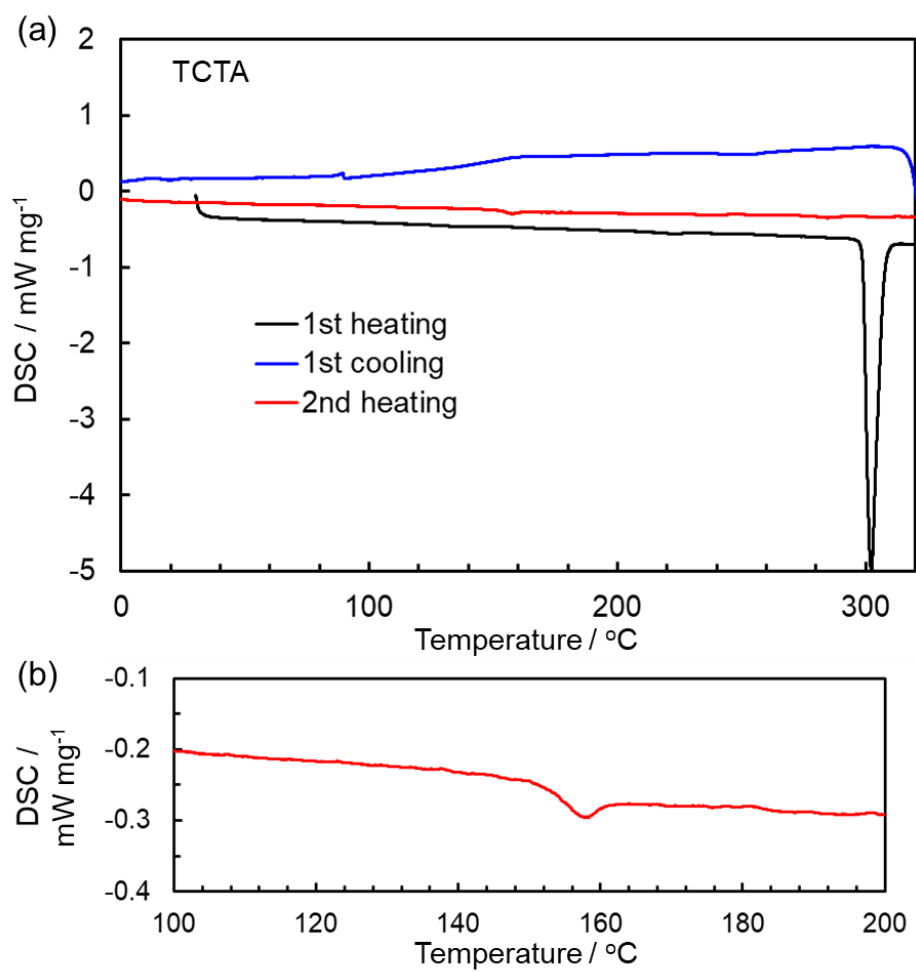

Fig. S20 (a) DSC curves of **TCTA** by heating and cooling processes. (b) Focusing  $T_g$  signal at 2<sup>nd</sup> heating.

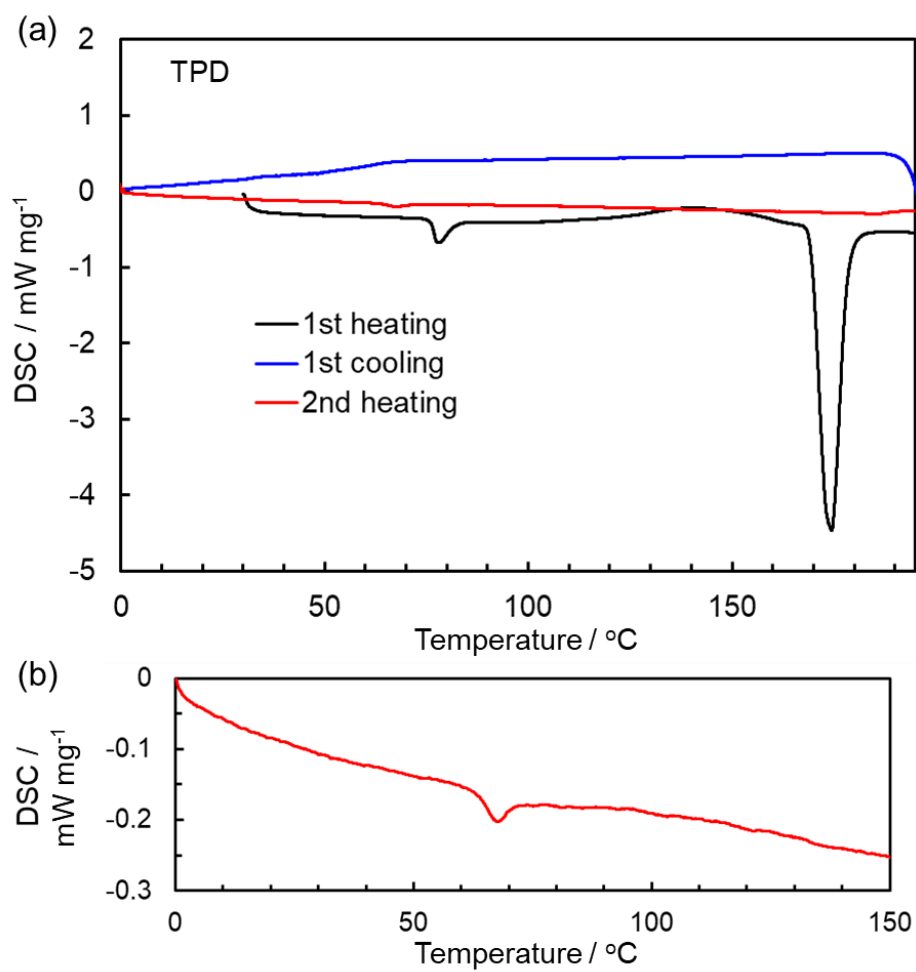

Fig. S2! (a) DSC curves of **TPD** by heating and cooling processes. (b) Focusing  $T_g$  signal at 2<sup>nd</sup> heating.



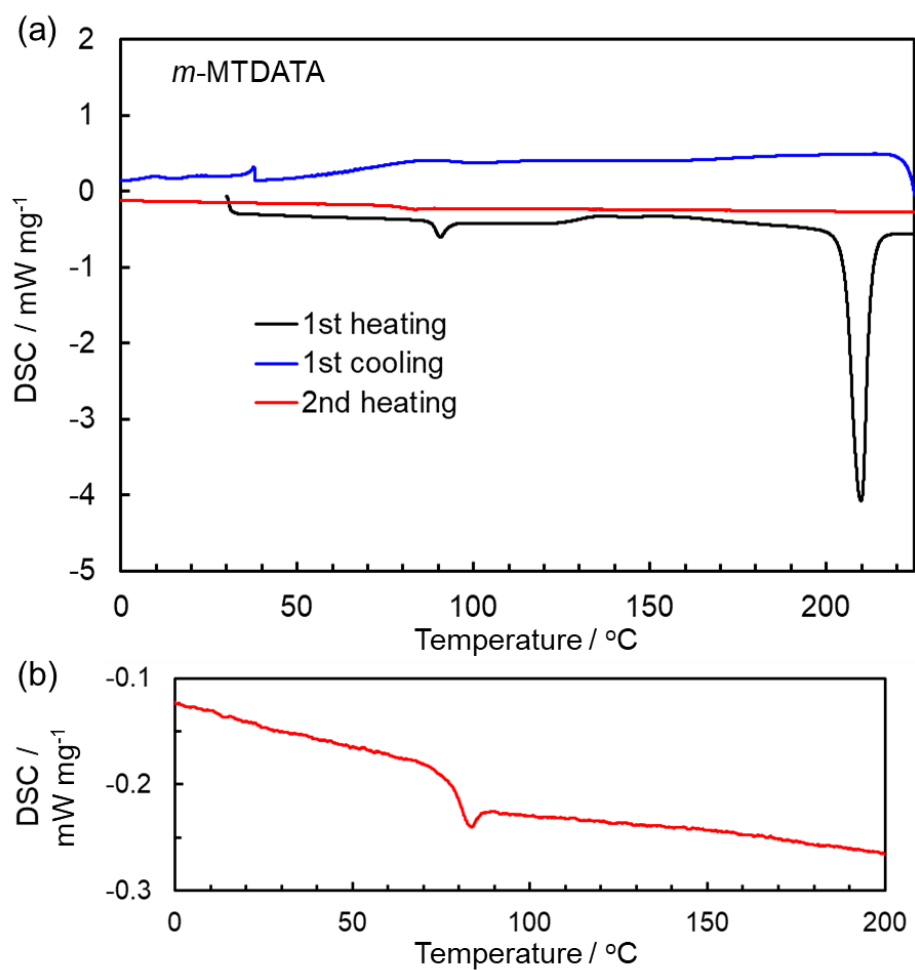

Fig. S22 (a) DSC curves of *m*-MTDATA by heating and cooling processes. (b) Focusing  $T_g$  signal at 2<sup>nd</sup> heating.

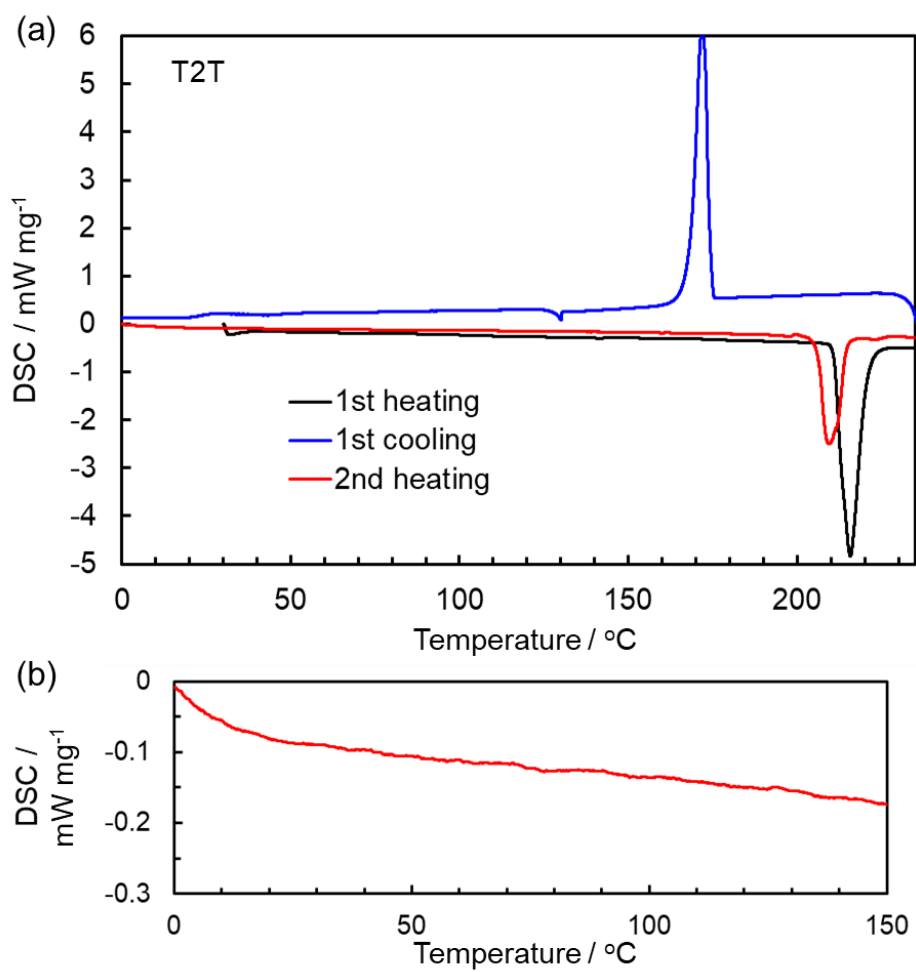

Fig. S23 (a) DSC curves of **T2T** by heating and cooling processes. (b) Focusing  $T_g$  signal at 2<sup>nd</sup> heating.

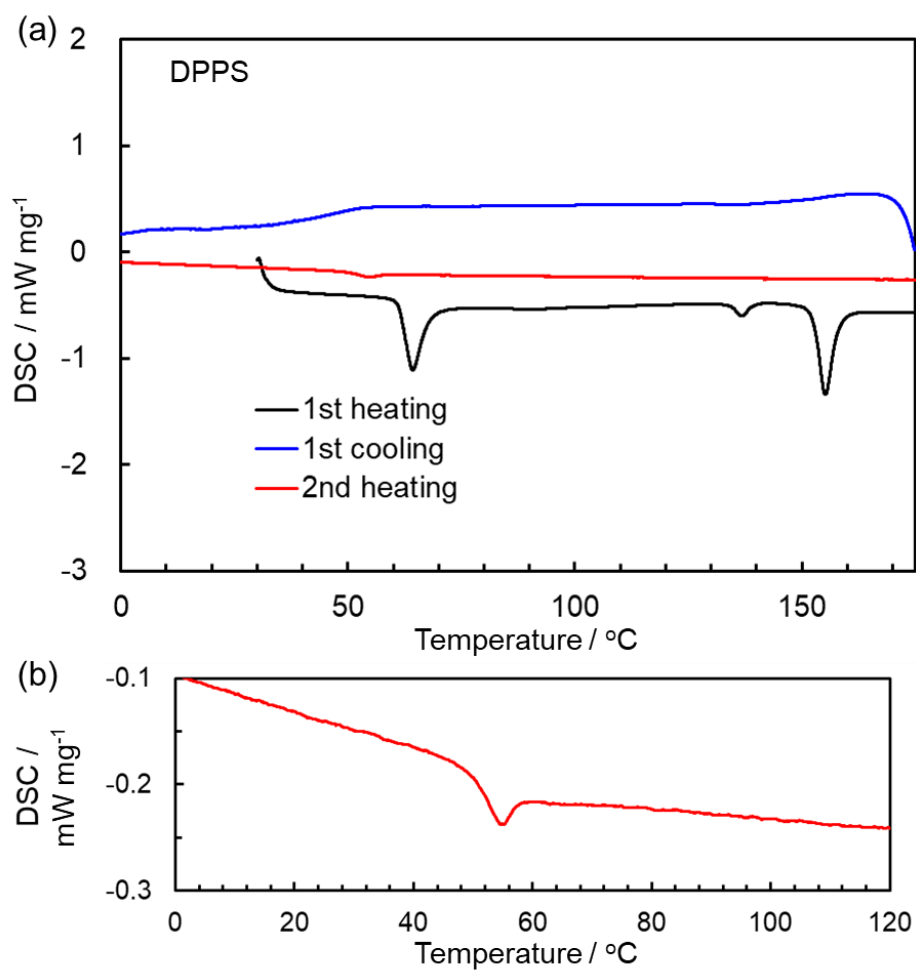

Fig. S24 (a) DSC curves of **DPPS** by heating and cooling processes. (b) Focusing  $T_g$  signal at 2<sup>nd</sup> heating.

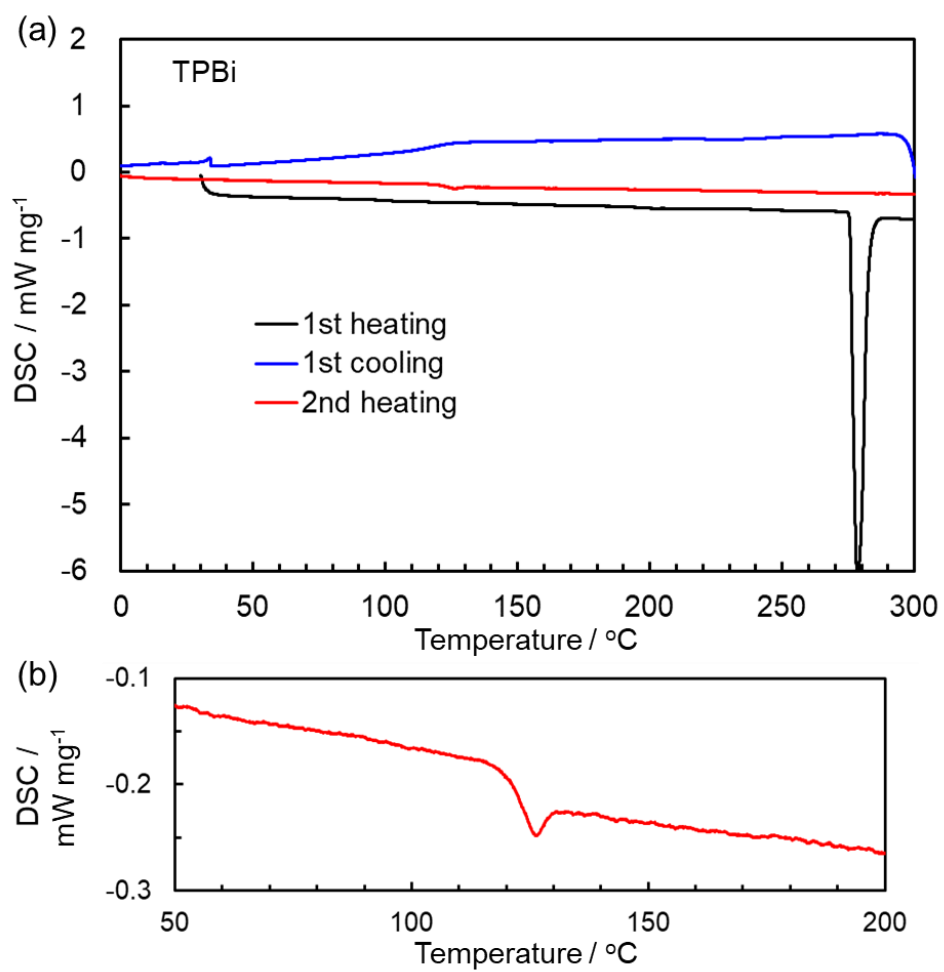

Fig. S25 (a) DSC curves of **TPBi** by heating and cooling processes. (b) Focusing  $T_g$  signal at 2<sup>nd</sup> heating.

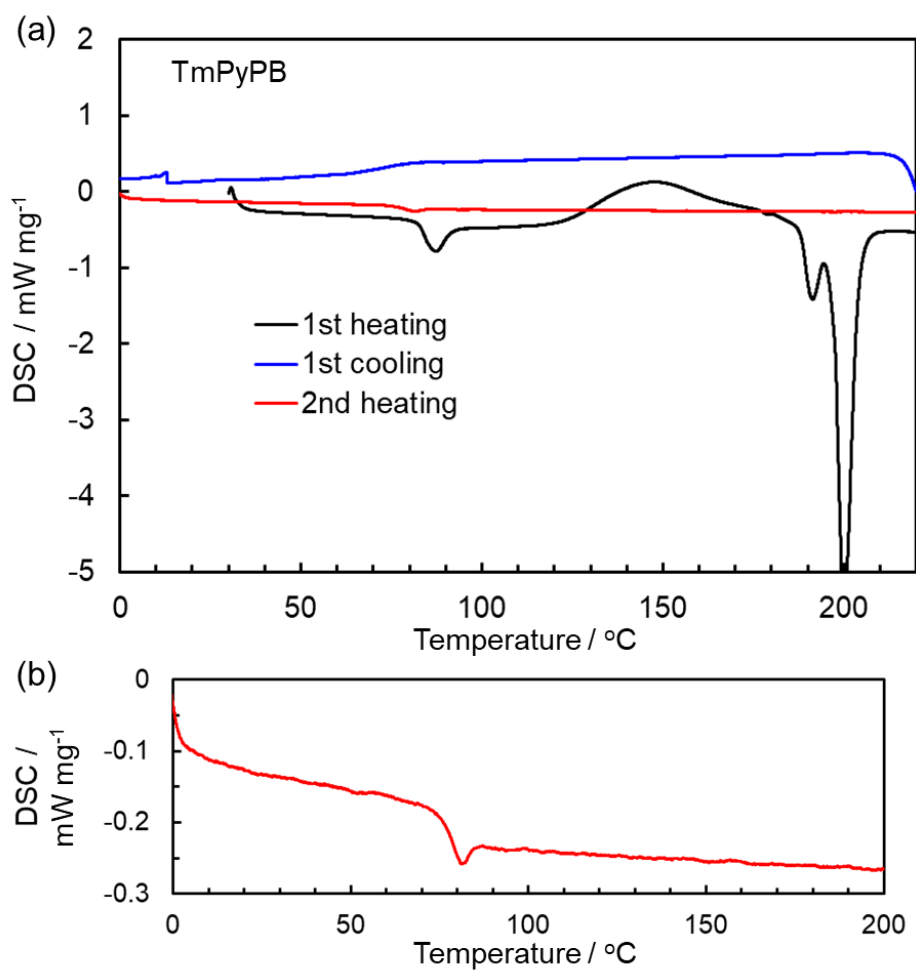

Fig. S26 (a) DSC curves of **TmPyPB** by heating and cooling processes. (b) Focusing  $T_g$  signal at 2<sup>nd</sup> heating.

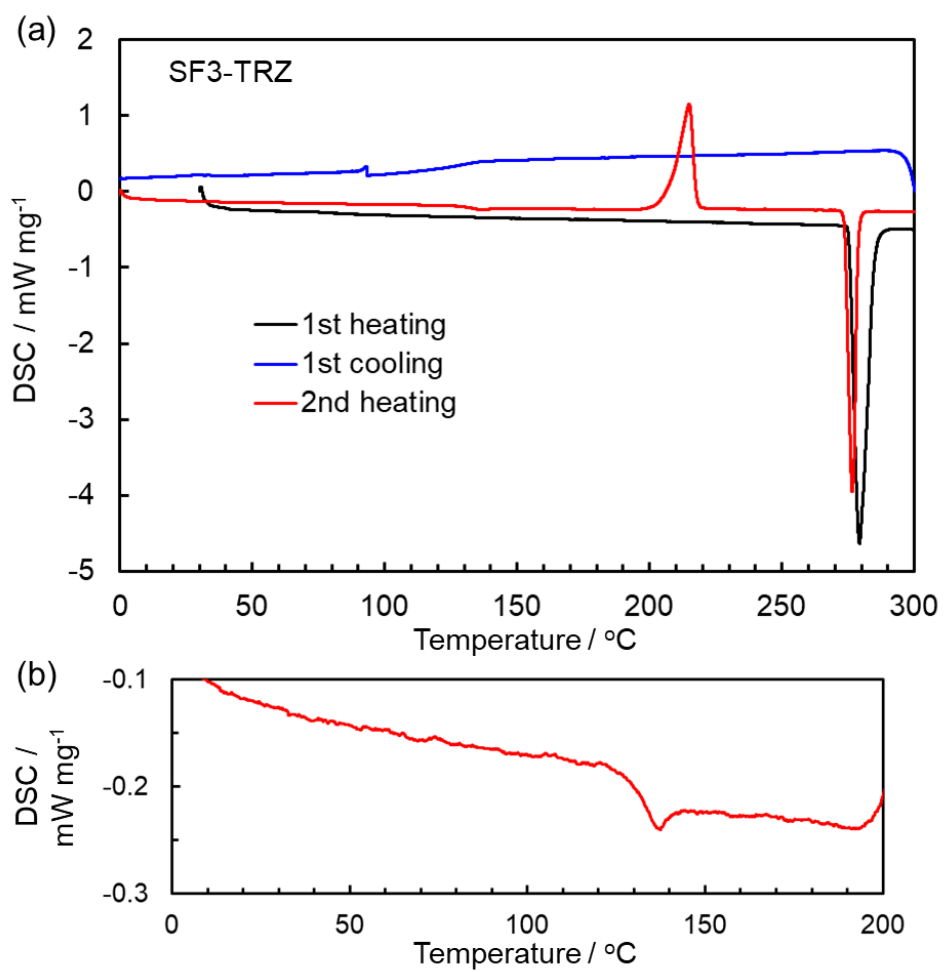

Figure S27. (a) DSC curves of **SF3-TRZ** by heating and cooling processes. (b) Focusing  $T_g$  signal at 2<sup>nd</sup> heating.

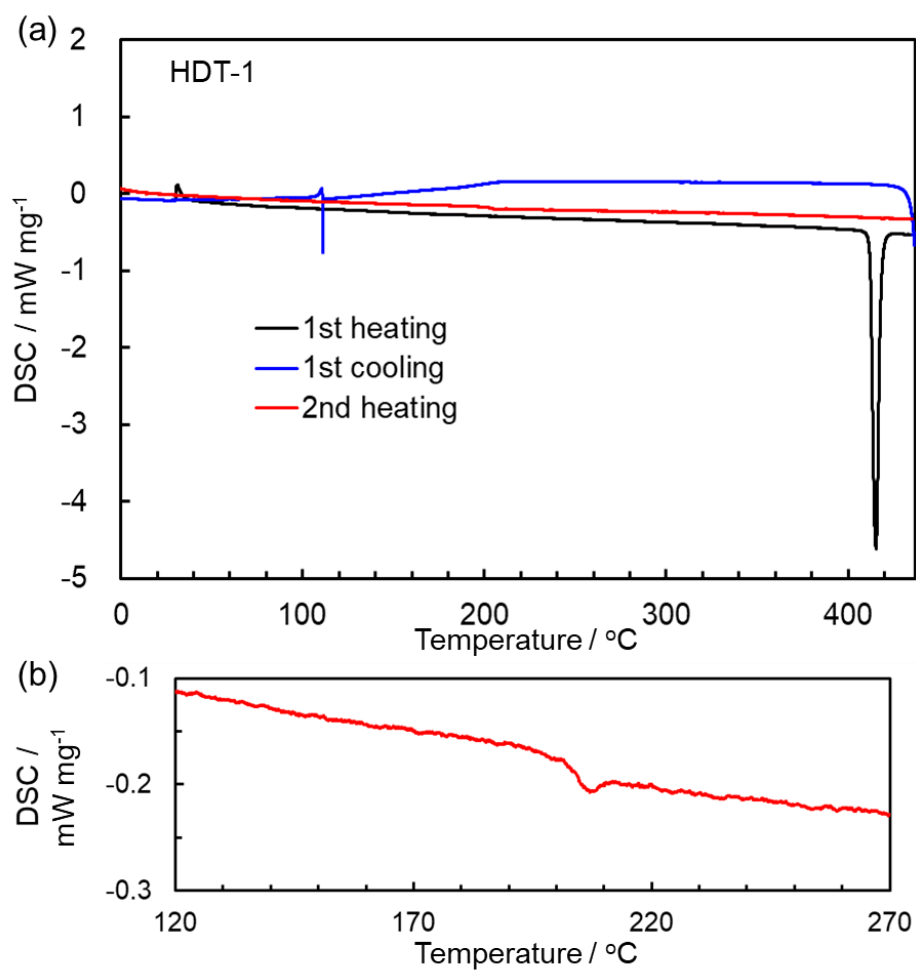

Fig. S28 (a) DSC curves of **HDT-1** by heating and cooling processes. (b) Focusing  $T_g$  signal at 2<sup>nd</sup> heating.

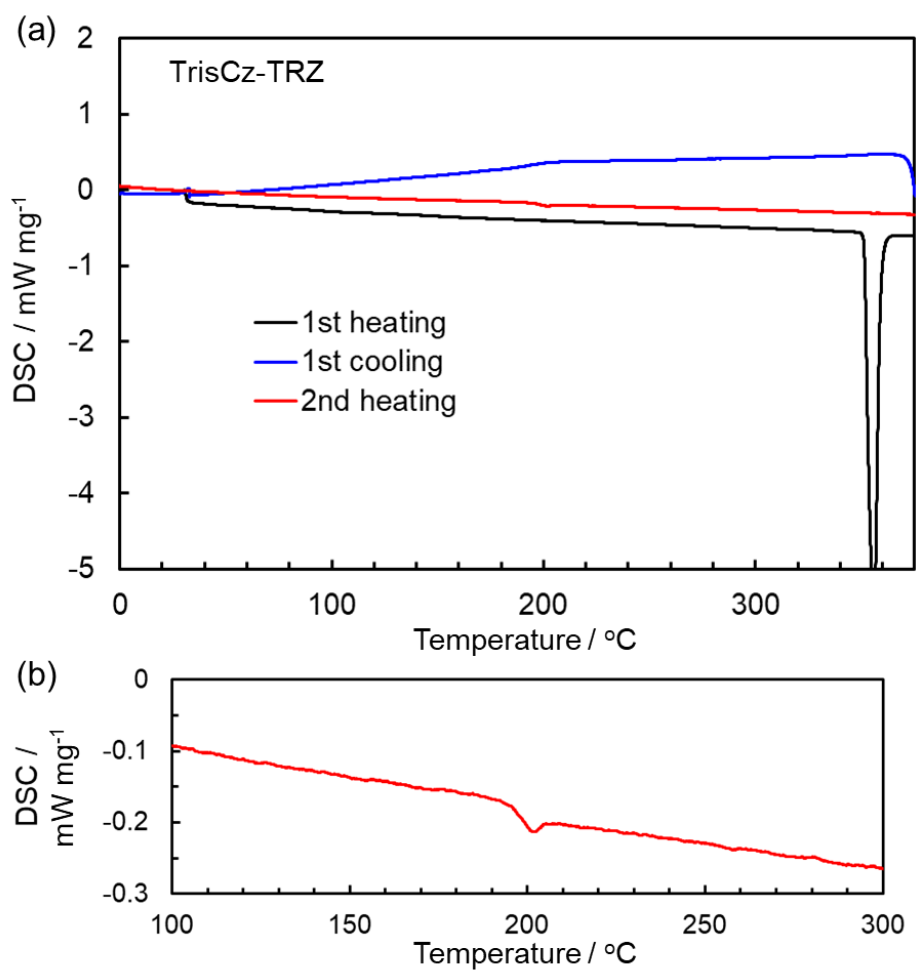

Fig. S29 (a) DSC curves of **TrisCz-TRZ** by heating and cooling processes. (b) Focusing  $T_g$  signal at 2<sup>nd</sup> heating.



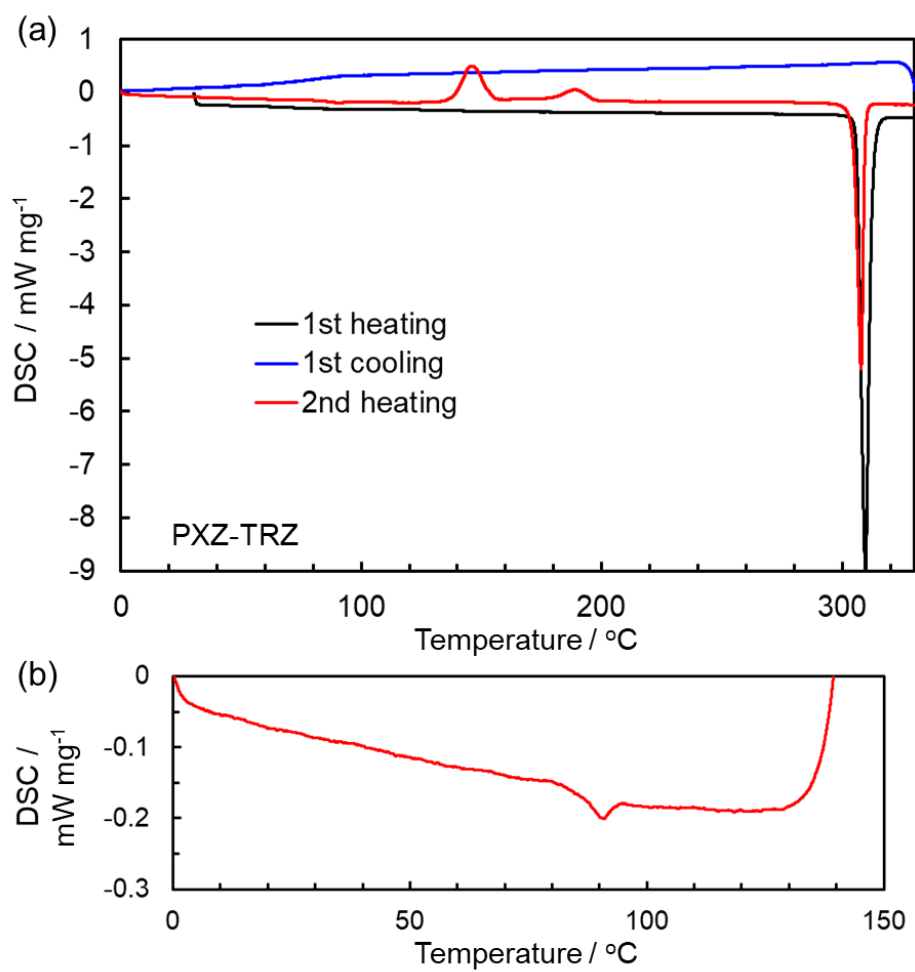

Fig. S30 (a) DSC curves of **PXZ-TRZ** by heating and cooling processes. (b) Focusing  $T_g$  signal at 2<sup>nd</sup> heating.

### 13. Appendix: Characterization of DSC curves

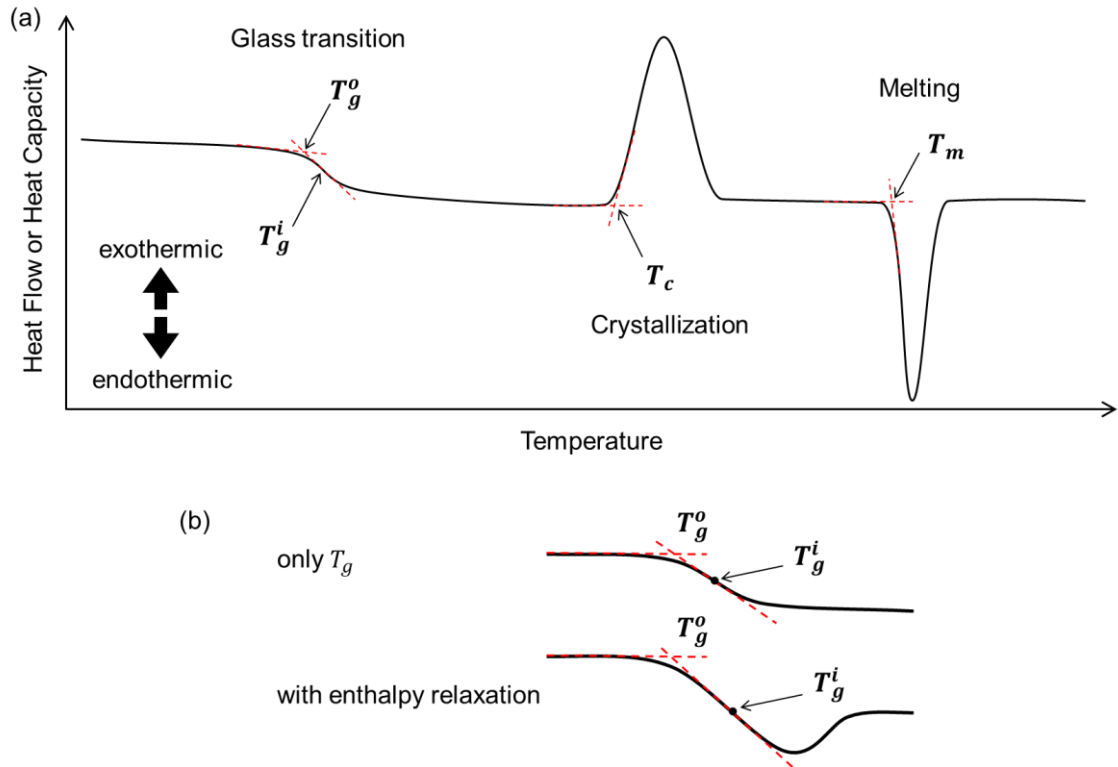

Fig. S31 (a) Illustration of typical DSC curves and definition of  $T_g^o$ ,  $T_g^i$ ,  $T_c$ , and  $T_m$ . (b) Focusing illustration of glass transition temperature region in case of with and without enthalpy relaxation.

## 14. Appendix: Purity of materials

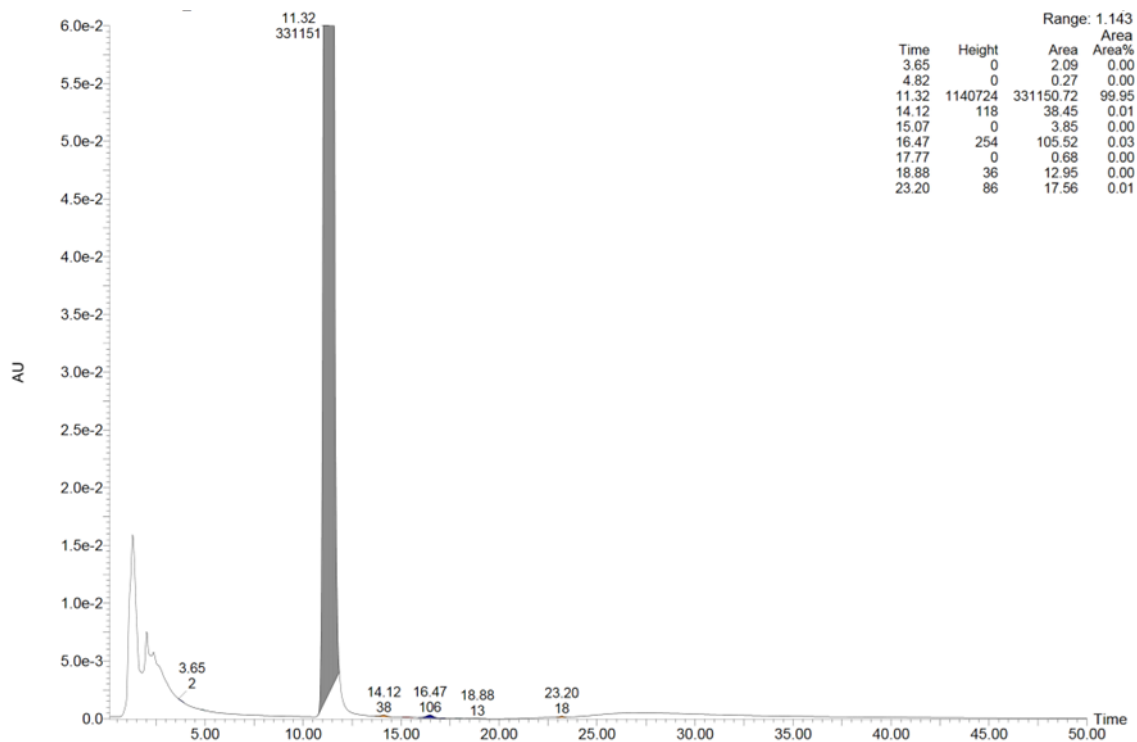

Fig. S32 HPLC analytical chart for mCP.

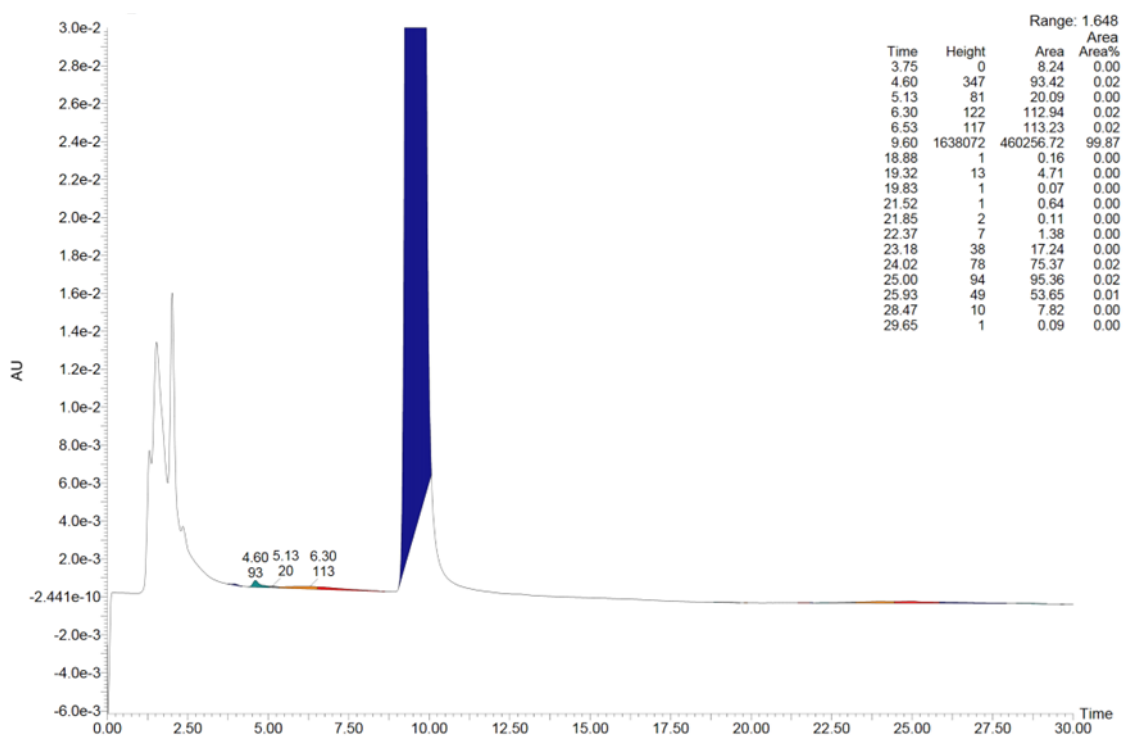

Fig. S33 HPLC analytical chart for CBP.

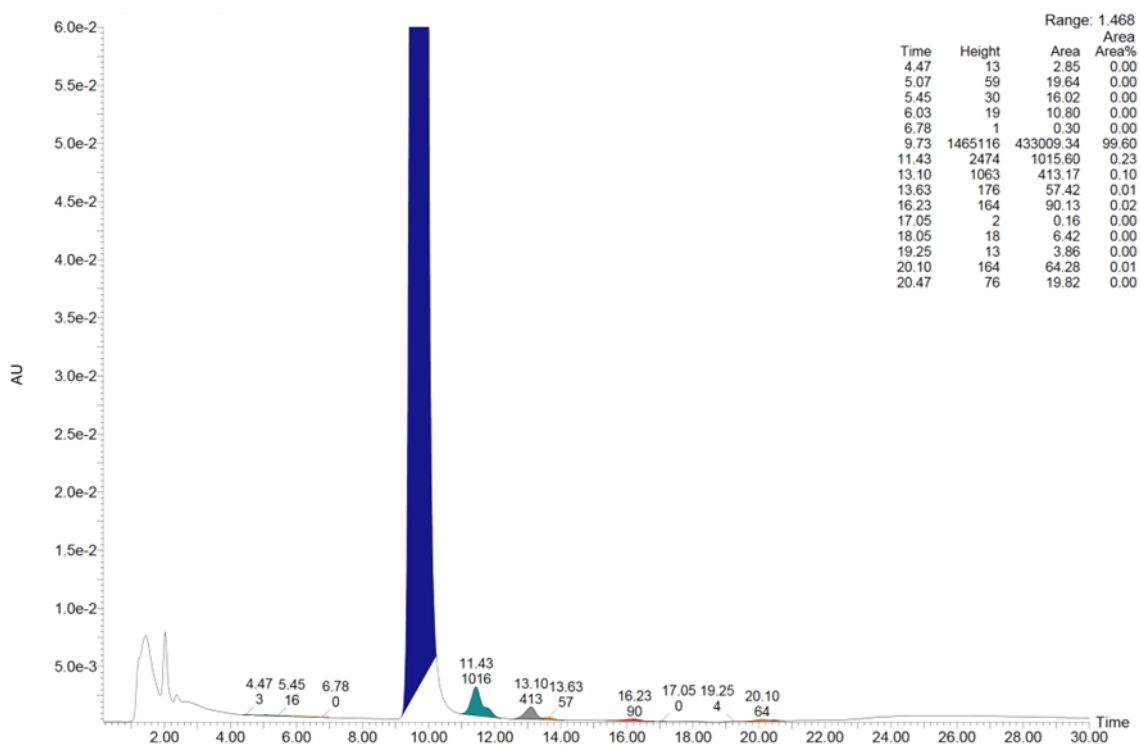

Fig. S34 HPLC analytical chart for **CBP**.

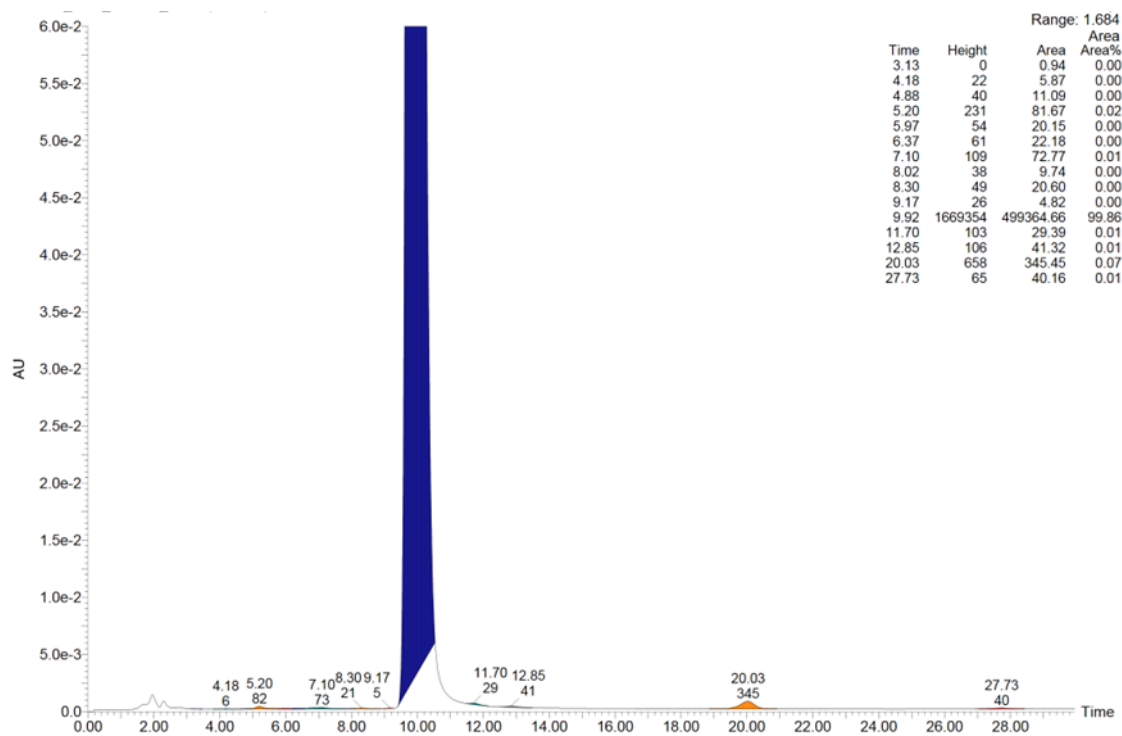

Fig. S35 HPLC analytical chart for **Cz-TRZ**.

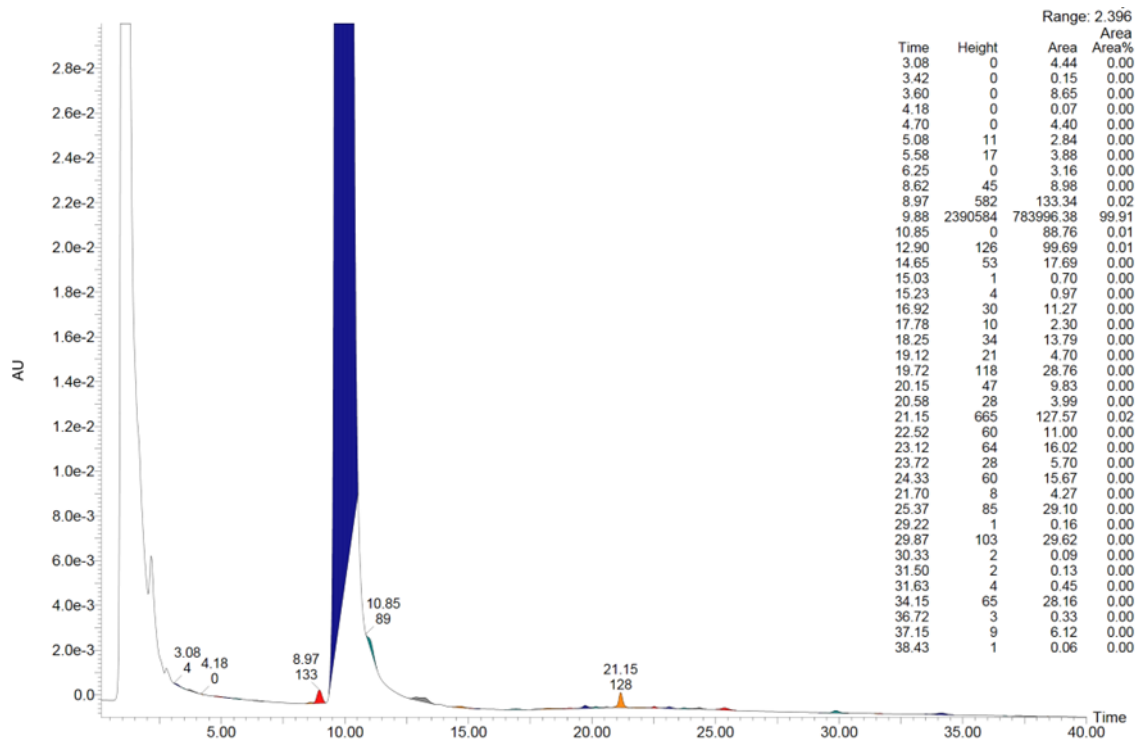

Fig. S36 HPLC analytical chart for PPT.

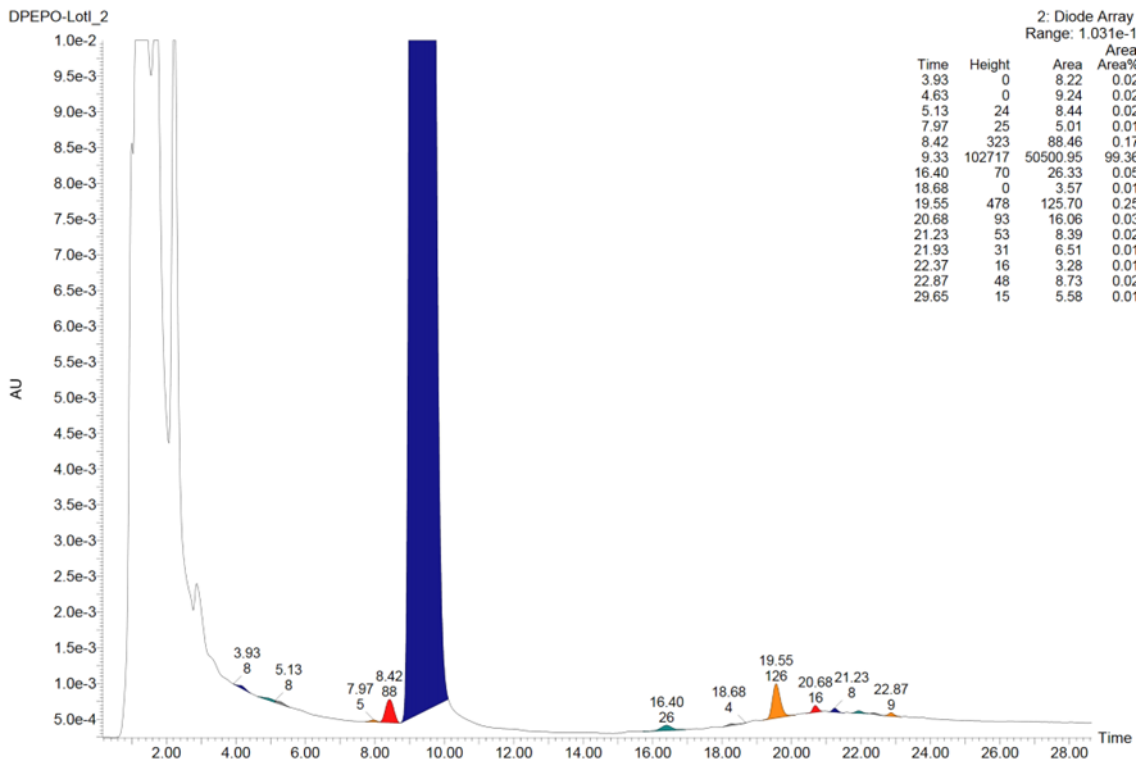

Fig. S37 HPLC analytical chart for DPEPO.

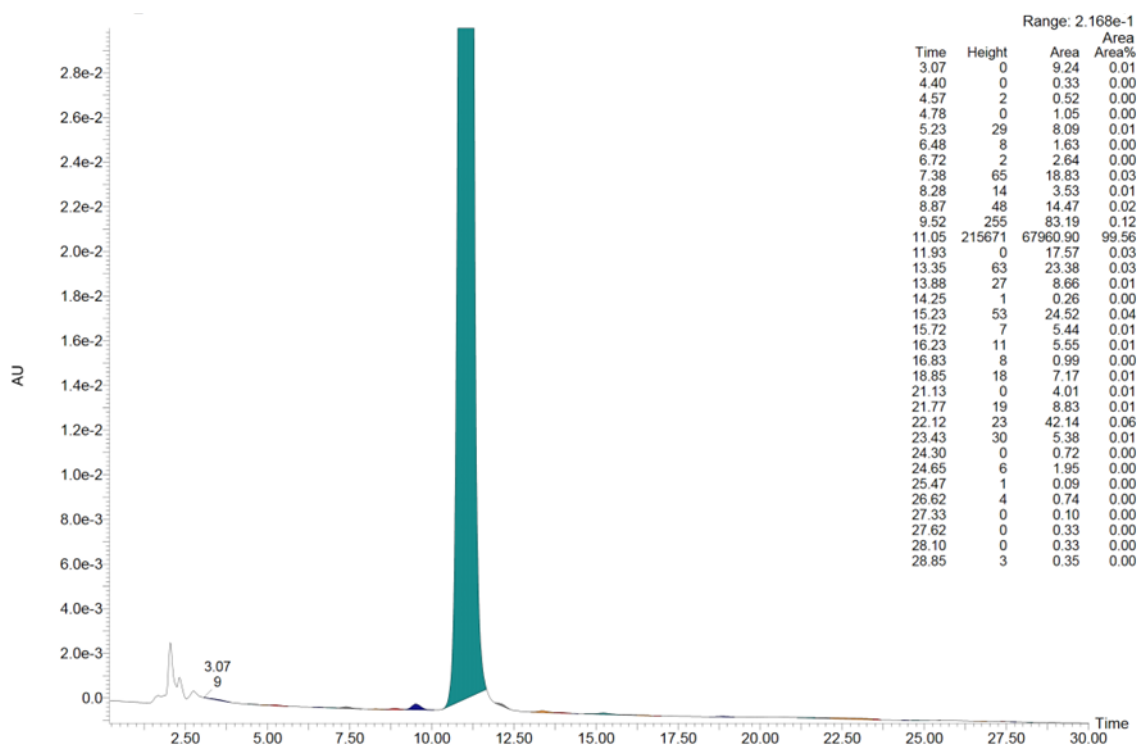

Fig. S38 HPLC analytical chart for TAPC.

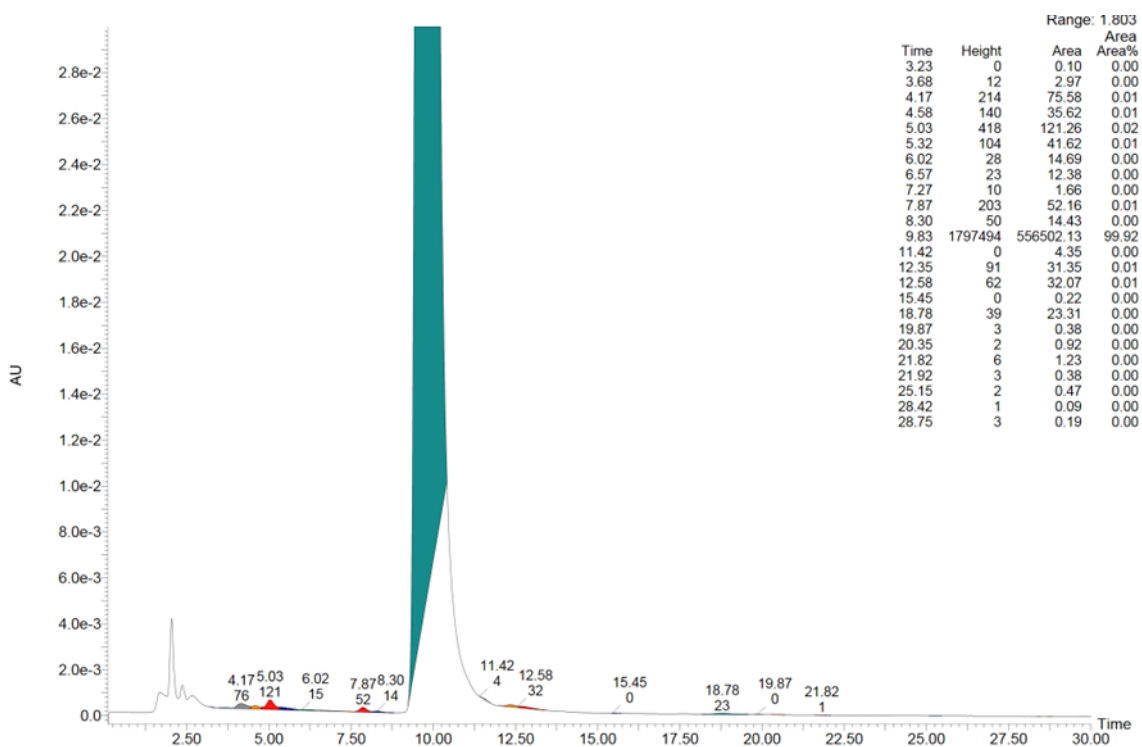

Fig. S39 HPLC analytical chart for Tris-PCz.

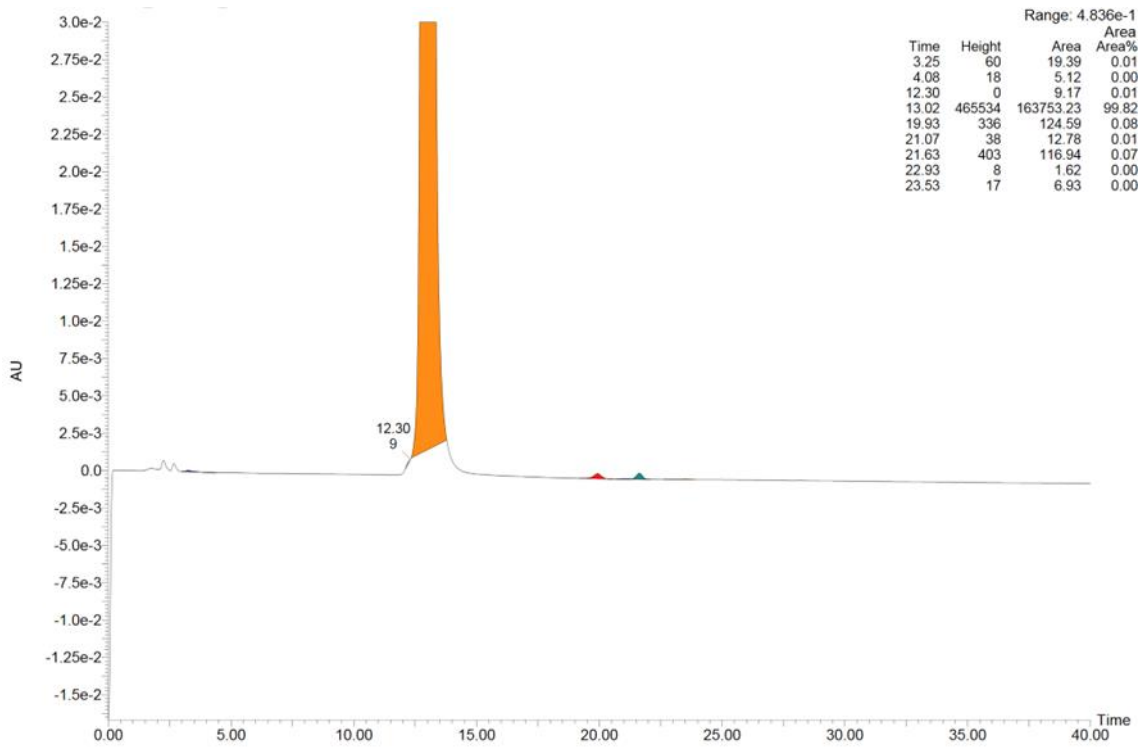

Fig. S40 HPLC analytical chart for  $\alpha$ -NPD.

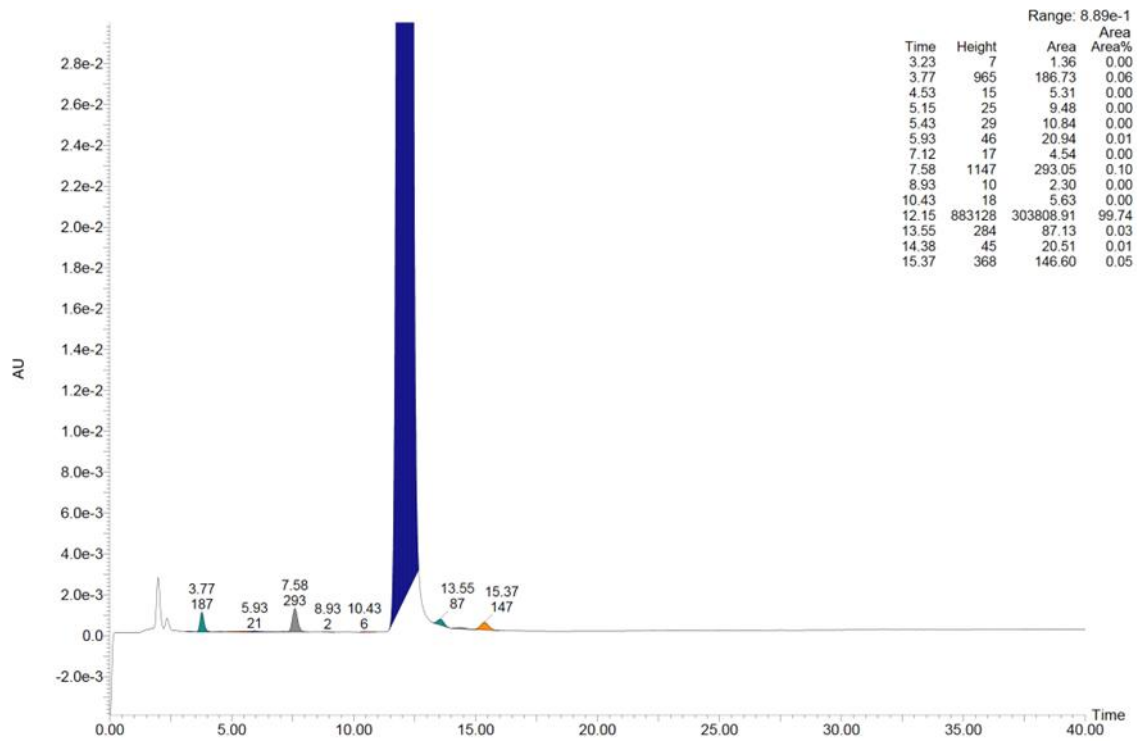

Fig. S41 HPLC analytical chart for TCTA.

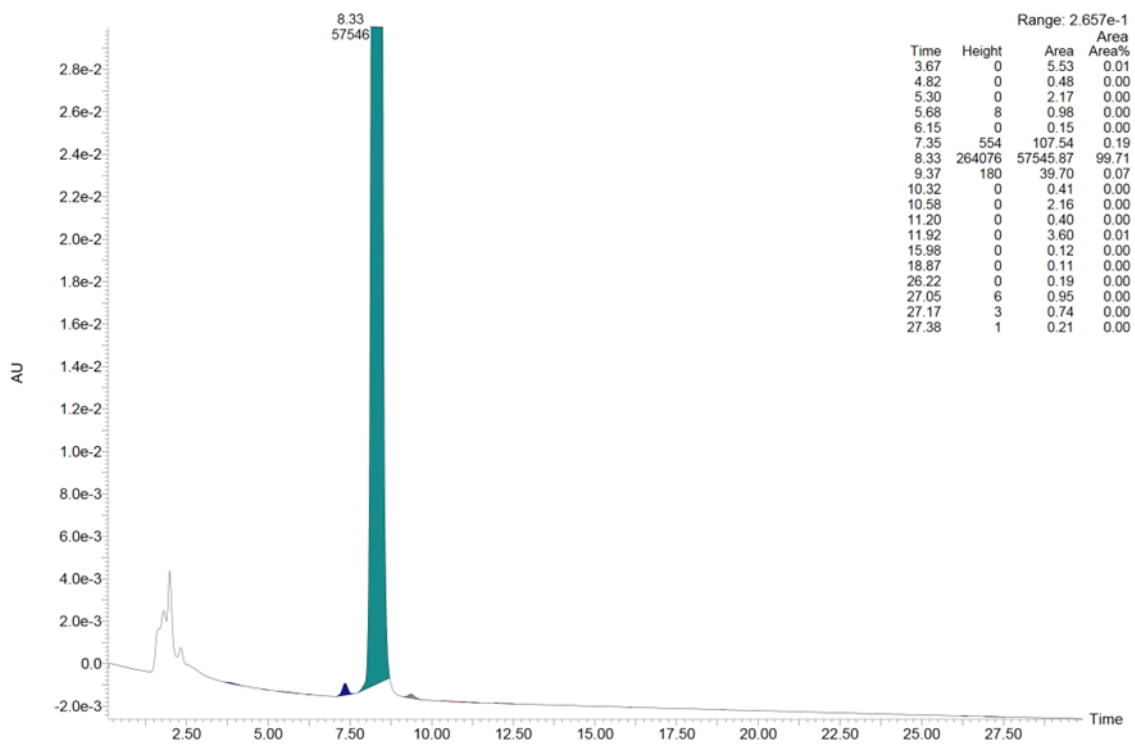

Fig. S42 HPLC analytical chart for TPD.

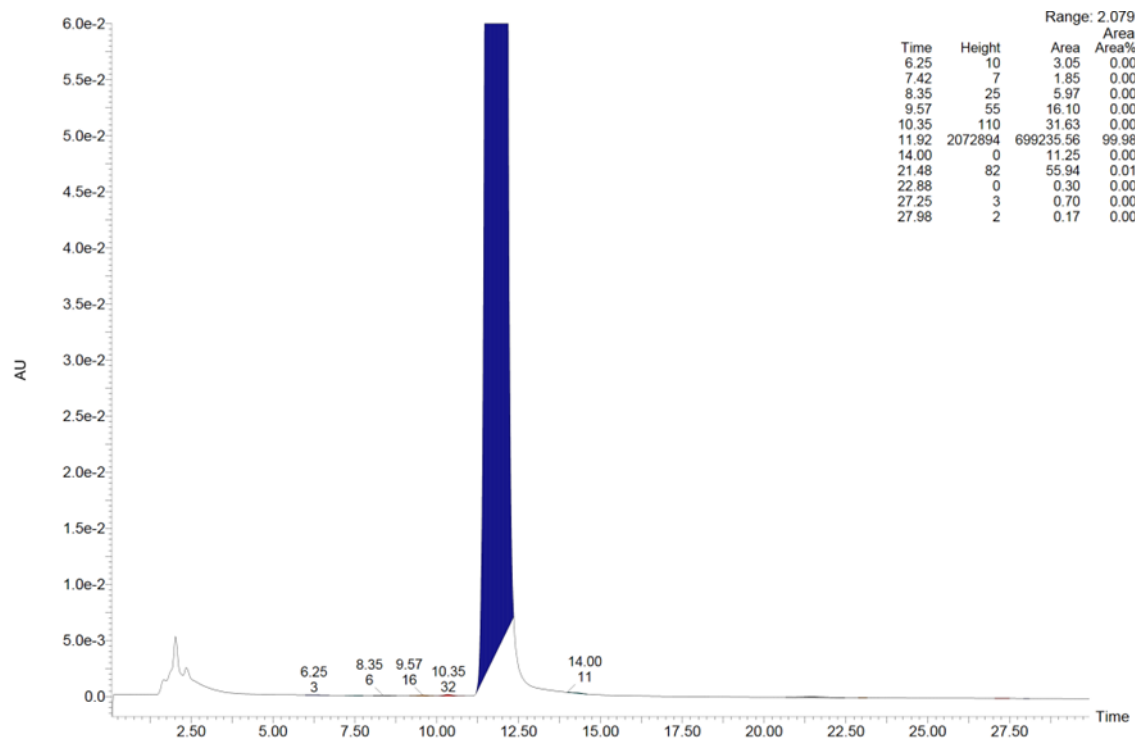

Fig. S43 HPLC analytical chart for T2T.



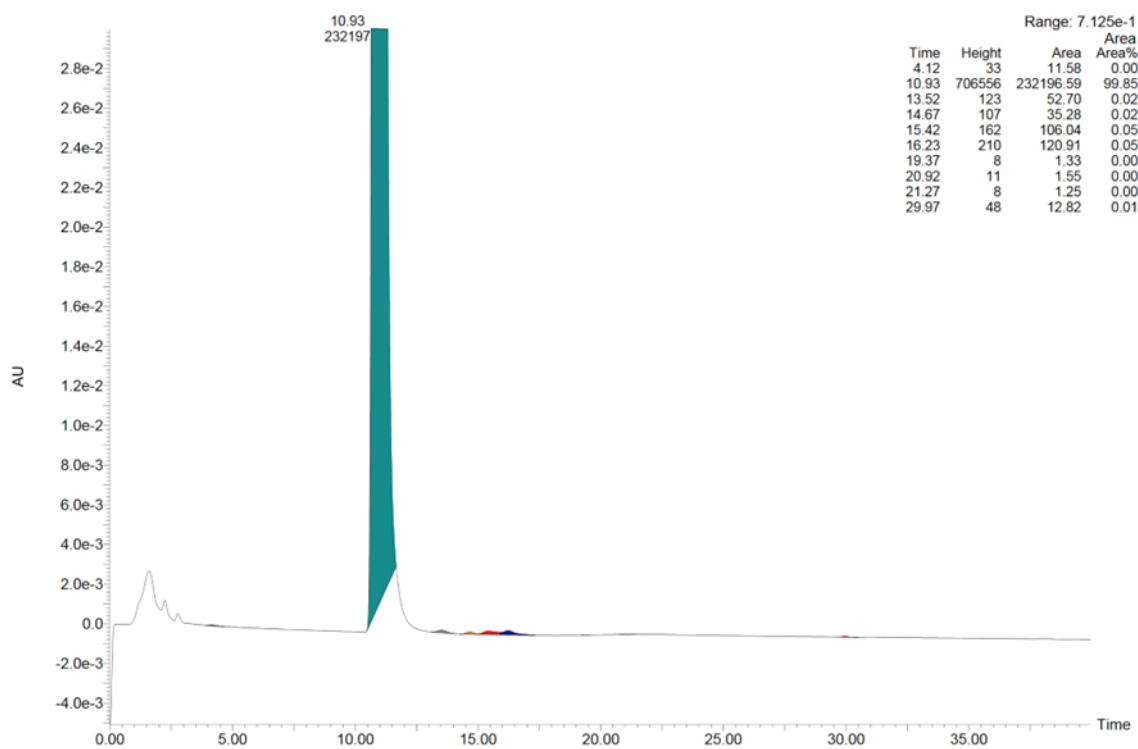

Fig. S44 HPLC analytical chart for TPBi.

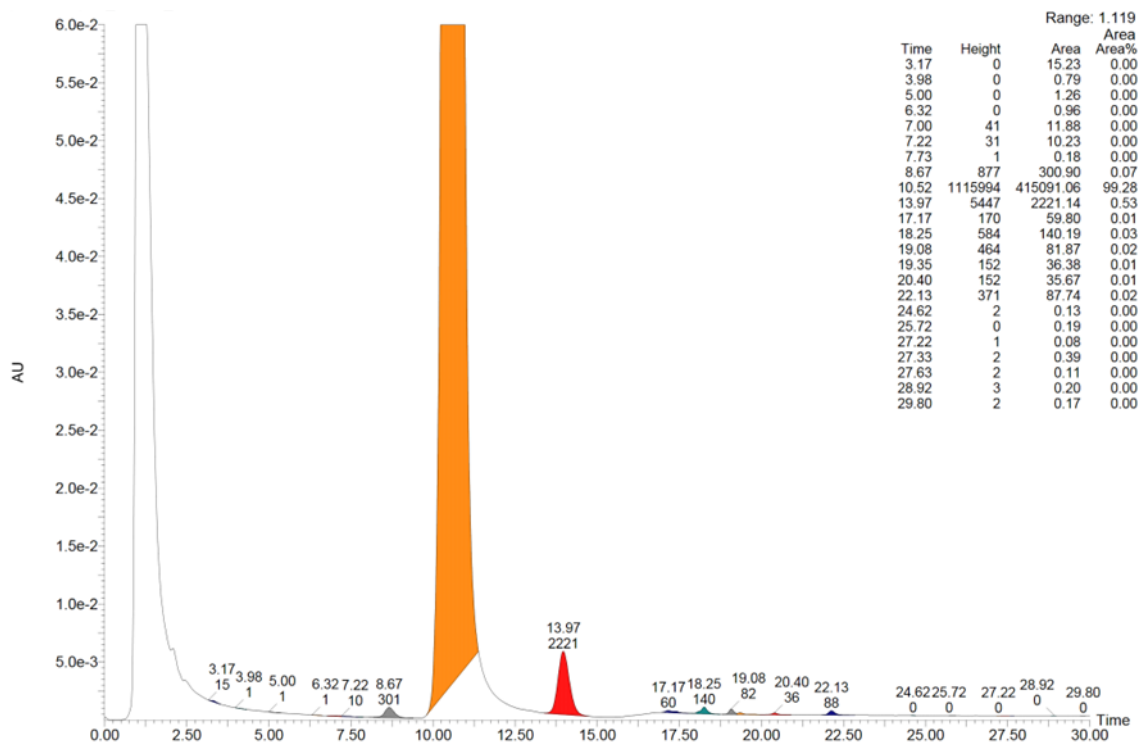

Fig. S45 HPLC analytical chart for TmPyPB.

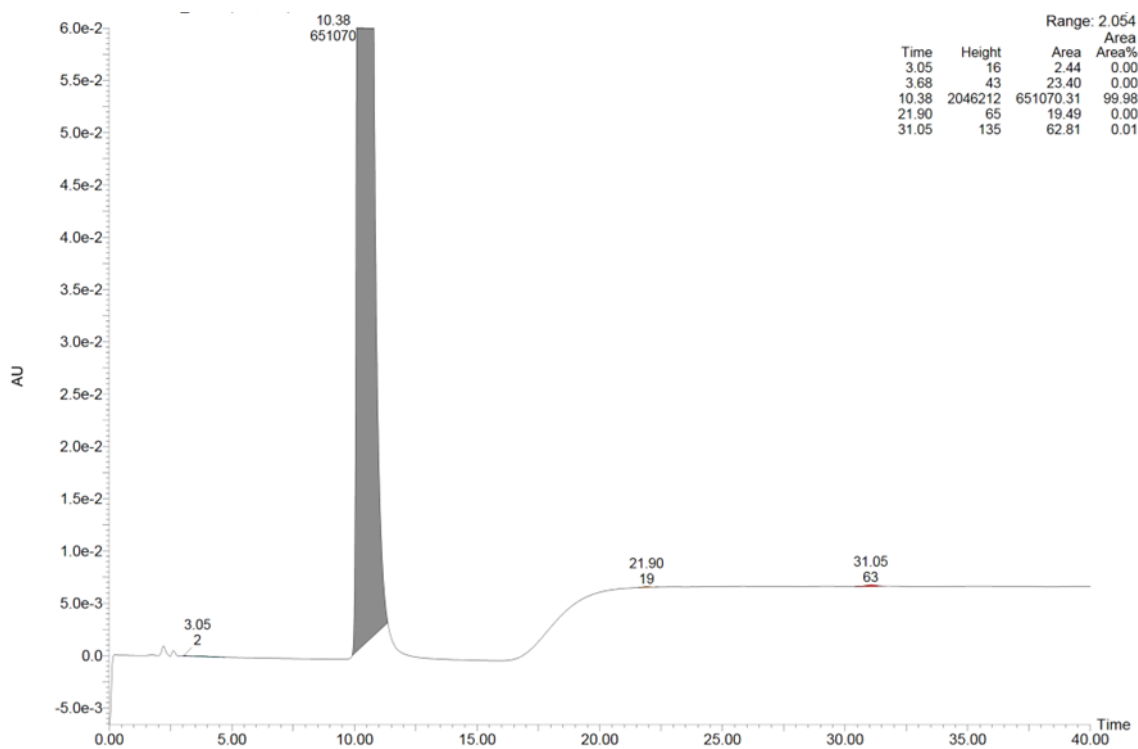

Fig. S46 HPLC analytical chart for **SF3-TRZ**.

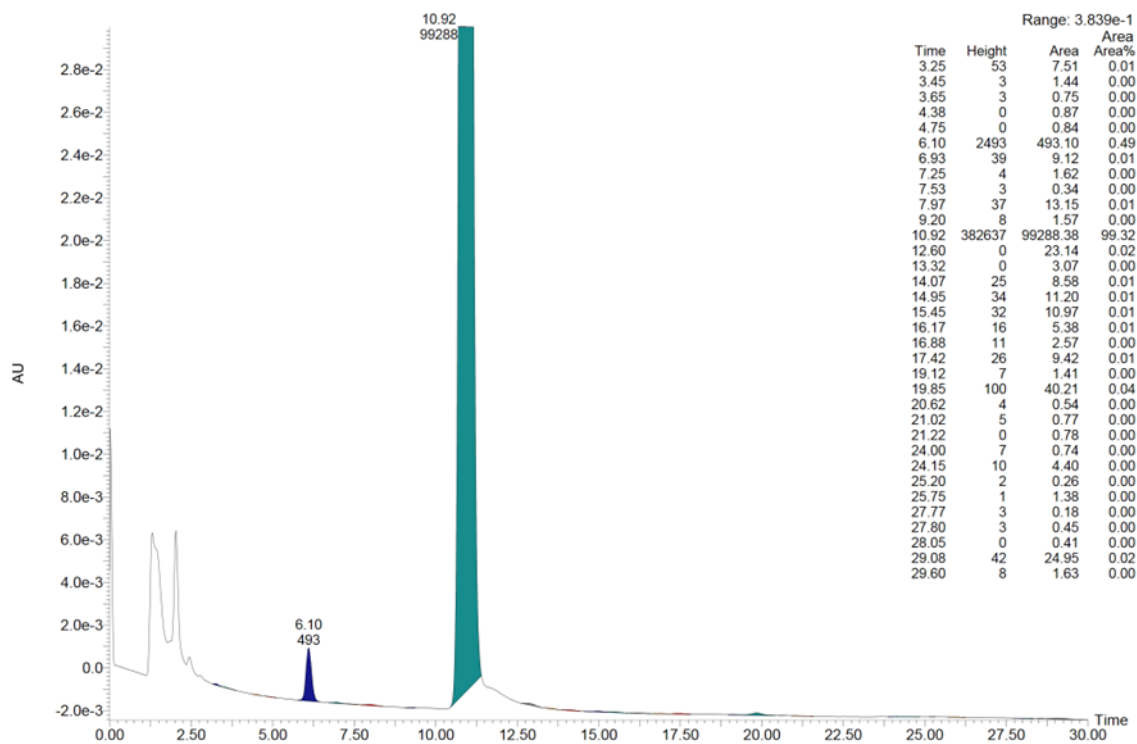

Fig. S47 HPLC analytical chart for **4CzIPN**.

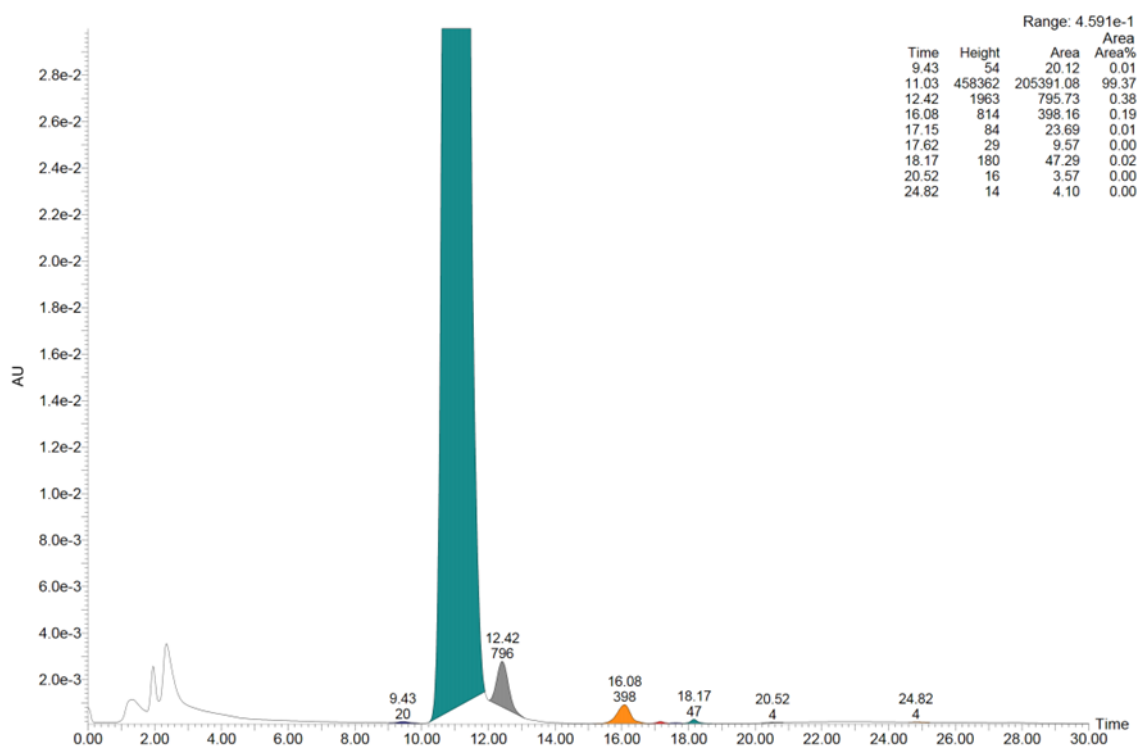

Fig. S48 HPLC analytical chart for **5CzTRZ**.

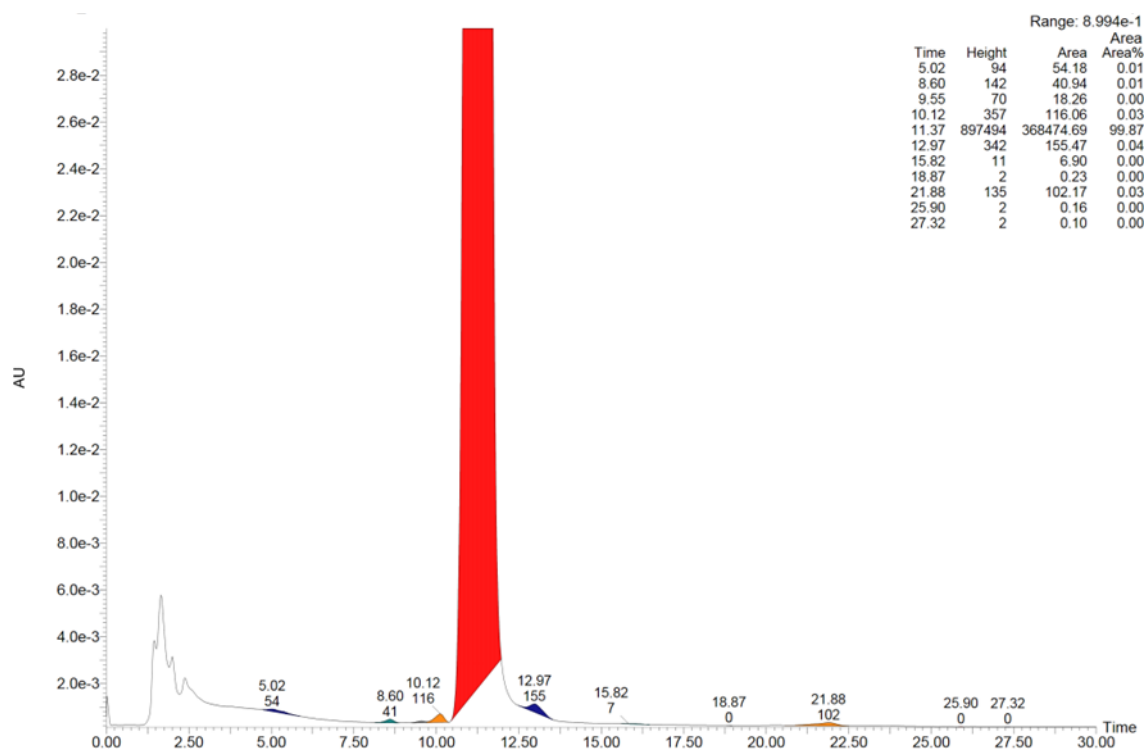

Fig. S49 HPLC analytical chart for **HDT-1**.

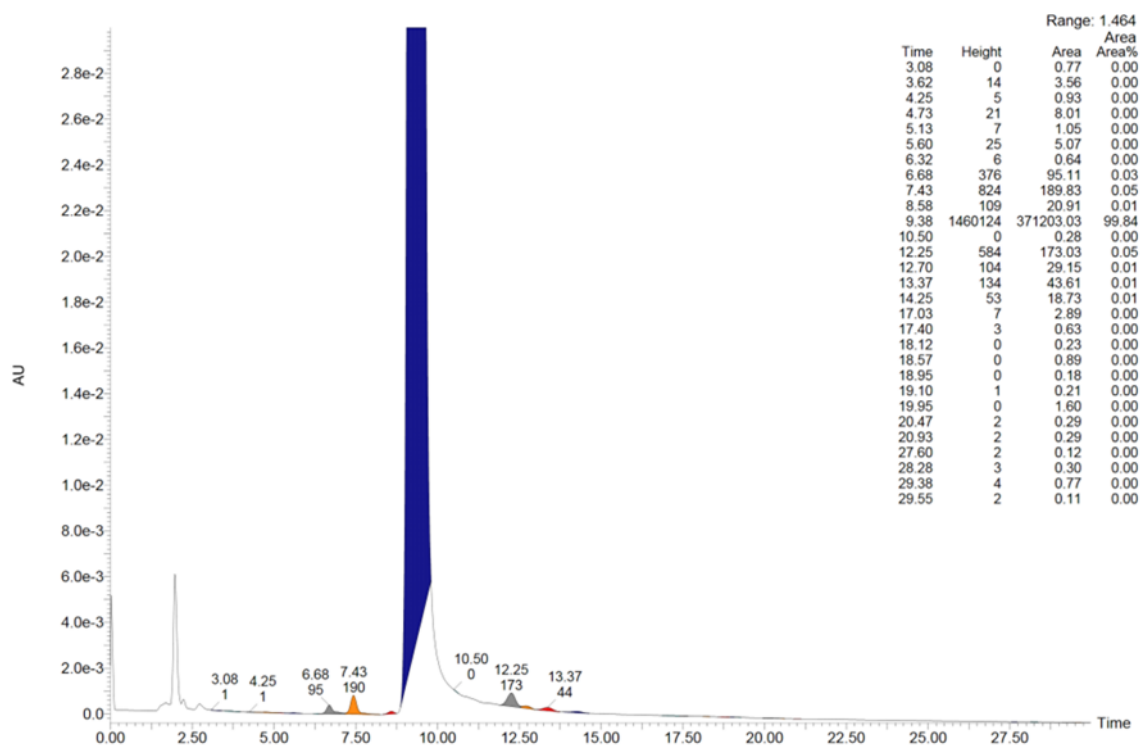

Fig. S50 PLC analytical chart for **TrisCz-TRZ**.

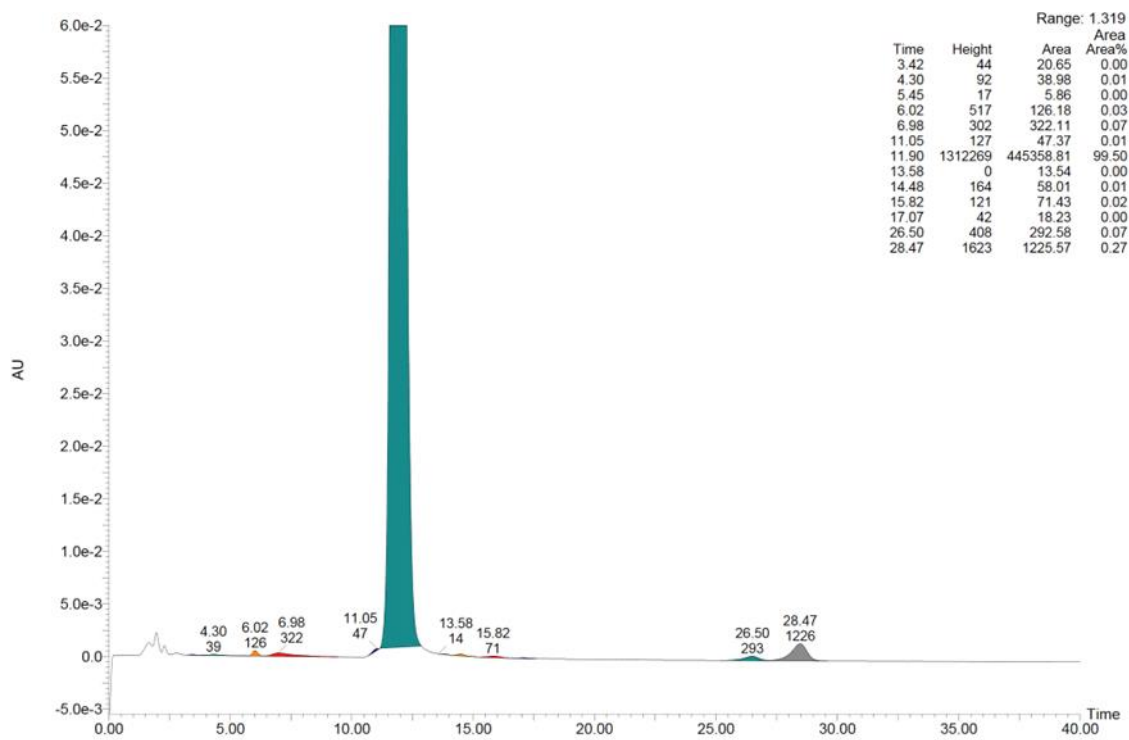

Fig. S51 HPLC analytical chart for **PXZ-TRZ**.
