# Supplementary material for: A convenient method to estimate the glass transition temperature of small organic semiconductor materials
Source: Royal Society of Chemistry journal article supplement (doi:10.1039/d2cc01467j), 2022-01-01
Supplement: d2cc01467j2.xlsx [file d2cc01467j2.xlsx]

## Sheet: Tg estimation of unknown sample
						onset		Target	Theoretical Tg				inflection		Target	Theoretical Tg													Fox equation	onset		Fox equation	inflection
	Matrix	Target	ratio	Tg_onset	Tg_inflection	Tg onset in K		Tg estimation		RS	exp-avg		Tg in K		Tg estimation		RS	exp-avg										0	89.5		0	92.3
		0	0	89.5	92.3	362.5		#DIV/0!	362.5	0	231.547		365.3		#DIV/0!	365.3	0	215.111										0.01	89.1153		0.01	91.9287
	3.78	1.58	0.294776	78.9	81.7	351.9		328.892	351.494	0.165109	21.3136		354.7		331.675	354.662	0.00147375	16.5378										0.02	88.7315		0.02	91.5581
	3.76	3.78	0.501326	69.8	74.3	342.8		325.22	344.171	1.88086	20.1003		347.3		331.073	347.569	0.0724098	11.1111										0.03	88.3485		0.03	91.1882
	3.79	2.51	0.398413	75.4	78.2	348.4		329.073	347.781	0.382906	1.24694		351.2		331.859	351.067	0.0176566	0.321111										0.04	87.9662		0.04	90.8191
	3.82	5.77	0.601668	67.2	71	340.2		326.887	340.723	0.273847	50.1736		344		331.214	344.225	0.0505954	44.0011										0.05	87.5848		0.05	90.4508
	3.75	8.78	0.700718	64.9	68.3	337.9		328.382	337.387	0.263508	88.0469		341.3		331.984	340.986	0.0983659	87.1111										0.06	87.2042		0.06	90.0832
						0				0	0		0				0	0										0.07	86.8244		0.07	89.7163
						0				0	0		0				0	0										0.08	86.4454		0.08	89.3502
						0				0	0		0				0	0										0.09	86.0672		0.09	88.9849
						0				0	0		0				0	0										0.1	85.6898		0.1	88.6202
						0				0	0		0				0	0										0.11	85.3131		0.11	88.2563
						0				0	0		0				0	0										0.12	84.9373		0.12	87.8931
						0				0	0		0				0	0										0.13	84.5623		0.13	87.5307
						0				0	0		0				0	0										0.14	84.188		0.14	87.169
						0				0	0		0				0	0										0.15	83.8145		0.15	86.808
						0				0	0		0				0	0										0.16	83.4418		0.16	86.4477
						0				0	0		0				0	0										0.17	83.0699		0.17	86.0882
						0				0	0		0				0	0										0.18	82.6988		0.18	85.7293
						0				0	0		0				0	0										0.19	82.3284		0.19	85.3712
						0				0	0		0				0	0										0.2	81.9588		0.2	85.0138
	This spread sheet is provided as ESI for					±	1.38224	1.45489					±	4.29372	0.357555													0.21	81.59		0.21	84.6571
		Y. Tsuchiya et al., Chem. Commun. 2022.																										0.22	81.2219		0.22	84.3012
																												0.23	80.8546		0.23	83.9459
	Please refer our original paper when you use this spread sheet.																											0.24	80.488		0.24	83.5913
																												0.25	80.1223		0.25	83.2375
	Analytical results:												How to use:															0.26	79.7572		0.26	82.8843
		Estimated Tg											1. Put Tg value (oC) of matrix to blue cells.															0.27	79.393		0.27	82.5319
		onset	inflection										2. Put weighing capacity value (mg) to Yellow cells.															0.28	79.0294		0.28	82.1801
	in K	327.691	331.561										3. Put Tg value (oC) of blends to green cells.															0.29	78.6667		0.29	81.829
	in oC	54.6906	58.561										4. See "Analytical results" and plot with theoretical line.															0.3	78.3046		0.3	81.4787
	Error	±1.38	±4.29																									0.31	77.9434		0.31	81.129
	Std.Dev.	1.45489	0.357555																									0.32	77.5828		0.32	80.78
	R2	0.992808	0.999357																									0.33	77.223		0.33	80.4317
																												0.34	76.864		0.34	80.0841
																												0.35	76.5056		0.35	79.7371
																												0.36	76.148		0.36	79.3909
																												0.37	75.7912		0.37	79.0453
																												0.38	75.435		0.38	78.7004
																												0.39	75.0796		0.39	78.3562
																												0.4	74.725		0.4	78.0126
																												0.41	74.371		0.41	77.6698
																												0.42	74.0178		0.42	77.3275
																												0.43	73.6652		0.43	76.986
																												0.44	73.3134		0.44	76.6451
																												0.45	72.9623		0.45	76.3049
																												0.46	72.6119		0.46	75.9654
																												0.47	72.2623		0.47	75.6265
																												0.48	71.9133		0.48	75.2882
																												0.49	71.565		0.49	74.9507
																												0.5	71.2175		0.5	74.6137
																												0.51	70.8706		0.51	74.2775
																												0.52	70.5245		0.52	73.9418
																												0.53	70.179		0.53	73.6069
																												0.54	69.8342		0.54	73.2725
																												0.55	69.4902		0.55	72.9388
																												0.56	69.1468		0.56	72.6058
																												0.57	68.8041		0.57	72.2734
																												0.58	68.4621		0.58	71.9416
																												0.59	68.1207		0.59	71.6105
																												0.6	67.7801		0.6	71.28
																												0.61	67.4401		0.61	70.9502
																												0.62	67.1008		0.62	70.6209
																												0.63	66.7622		0.63	70.2923
																												0.64	66.4243		0.64	69.9644
																												0.65	66.087		0.65	69.637
																												0.66	65.7504		0.66	69.3103
																												0.67	65.4144		0.67	68.9842
																												0.68	65.0792		0.68	68.6587
																												0.69	64.7446		0.69	68.3339
																												0.7	64.4106		0.7	68.0096
																												0.71	64.0773		0.71	67.686
																												0.72	63.7447		0.72	67.363
																												0.73	63.4128		0.73	67.0406
																												0.74	63.0814		0.74	66.7188
																												0.75	62.7508		0.75	66.3976
																												0.76	62.4208		0.76	66.0771
																												0.77	62.0914		0.77	65.7571
																												0.78	61.7627		0.78	65.4377
																												0.79	61.4346		0.79	65.119
																												0.8	61.1072		0.8	64.8008
																												0.81	60.7804		0.81	64.4832
																												0.82	60.4542		0.82	64.1663
																												0.83	60.1287		0.83	63.8499
																												0.84	59.8038		0.84	63.5341
																												0.85	59.4796		0.85	63.2189
																												0.86	59.156		0.86	62.9043
																												0.87	58.833		0.87	62.5903
																												0.88	58.5106		0.88	62.2769
																												0.89	58.1889		0.89	61.964
																												0.9	57.8678		0.9	61.6518
																												0.91	57.5473		0.91	61.3401
																												0.92	57.2274		0.92	61.029
																												0.93	56.9082		0.93	60.7185
																												0.94	56.5895		0.94	60.4086
																												0.95	56.2715		0.95	60.0992
																												0.96	55.9541		0.96	59.7904
																												0.97	55.6373		0.97	59.4822
																												0.98	55.3211		0.98	59.1745
																												0.99	55.0055		0.99	58.8675
																												1	54.6906		1	58.561
																												0		89.5	0		92.3
																												0.294776		78.9	0.294776		81.7
																												0.501326		69.8	0.501326		74.3
																												0.398413		75.4	0.398413		78.2
																												0.601668		67.2	0.601668		71
																												0.700718		64.9	0.700718		68.3
																												0		0	0		0
																												0		0	0		0
																												0		0	0		0
																												0		0	0		0
																												0		0	0		0
																												0		0	0		0
																												0		0	0		0
																												0		0	0		0
																												0		0	0		0
																												0		0	0		0
																												0		0	0		0
																												0		0	0		0
																												0		0	0		0
																												0		0	0		0
